# Supplementary material
Source: PubMed Central journal article supplement (PMC3628399)
Supplement: NIHMS452739-supplement-01.pdf [file NIHMS452739-supplement-01.pdf]

**Table S1** All possible 52 nucleotide string combinations descriptive of known pairwise MICA allele combinations according to IMGT/HLA release v3.7.0.

| String <sup>1,2,3</sup>                              | Combination 1 |                                                             | Combination 2 |               | Additional Typing Needed to Resolve Ambiguity |
|------------------------------------------------------|---------------|-------------------------------------------------------------|---------------|---------------|-----------------------------------------------|
|                                                      | MICA Allele 1 | MICA Allele 2                                               | MICA Allele 1 | MICA Allele 2 |                                               |
| GTNCNTGCTNGCCCTTCGTNTGCGCTTGCCCTTGATCGGGGCCAGAGGGACG | MICA*001      | MICA*002:01/MICA*020/MICA*023/MICA*052/MICA*055             |               |               | Exon 5                                        |
| GTNCNTGCTNGCCCTTCGTNTGCGCTTGCCCTTGATCGGGGCCAGAGGGACG | MICA*001      | MICA*002:02                                                 |               |               |                                               |
| GNNCNTGCTNGCCCTTCGTNTGCGCTTGCCCTTGATCGGGGCCAGAGGGACG | MICA*001      | MICA*002:03                                                 |               |               |                                               |
| GTNCNTGCTNGCCCTTCGTNTGCGCTTGCCCTTGATCGGGGCCAGAGGGACG | MICA*001      | MICA*002:04                                                 |               |               |                                               |
| GTTNNTNCTNNCNNTTCGNNTGCGCTTGCCCNANNCNGGGCCAGAGGGACG  | MICA*001      | MICA*004                                                    |               |               |                                               |
| GTTNNTNCTNNGCCTTCGNNTGCGCTTGCCCNANNCNGGGCCAGAGGGACN  | MICA*001      | MICA*005                                                    |               |               | Please see footnote 3                         |
| GTTNNTNCTNNGNNTTCGNNTGCGCTTGCCCNANNCNGGGCCAGAGGGACG  | MICA*001      | MICA*006                                                    |               |               |                                               |
| GTTCNTGCTNGCCCTTCGTNTGCGCTTGCCCTTGATCGGGGCCAGAGGGACG | MICA*001      | MICA*007:01/MICA*026                                        | MICA*018:02   | MICA*040      | Insufficient data available                   |
| GTTCNTGCTNGCCCTTCGTNTGCGCTTGCCCTTGATCGGGGCCAGAGGGACG | MICA*001      | MICA*007:02                                                 | MICA*018:01   | MICA*040      | Insufficient data available                   |
| GTTCNTGCTNGCCCTTCGTNTGCGCTTGCCCTTGATCGGGGCCAGAGGGACG | MICA*001      | MICA*007:03                                                 |               |               |                                               |
| GTTCNTGCTAGCCCTTCGTNTGCGCTTGCCCTTGATCGGGGCCAGAGGGACG | MICA*001      | MICA*007:04                                                 |               |               |                                               |
| GTTNNTNCTNNGCCTTCGNNTGCGCTTGCCCNANNCNGGGCCAGAGGGACG  | MICA*001      | MICA*008:01:01/MICA*008:01:02/MICA*008:04/MICA*027/MICA*048 |               |               | Exons 1 and 5 and intron 1                    |
| GTTNNTNCTNNGCCTTCGNNTGCGCTTGCCCNANNCNGGGCCAGAGGGACG  | MICA*001      | MICA*008:02                                                 |               |               |                                               |
| GTTNNTNCTNNGCCTTCGNNTGCGCTTGCCCNANNCNGGGCCAGAGGGACG  | MICA*001      | MICA*008:03                                                 |               |               |                                               |
| GTTNNTNCTNNGCCTTCGNNTGCGCTTGCCCNANNCNGGGCCAGAGGGACG  | MICA*001      | MICA*009:01/MICA*049                                        |               |               | Exon 6                                        |
| GTTNNTNCTNNGCCTTCGNNTGCGCTTGCCCNANNCNGGGCCAGAGGGACG  | MICA*001      | MICA*009:02                                                 |               |               |                                               |
| NTTNNTNCTNNGCCTTCGNNTGCGCTTGCCCNANNCNGGGCCAGAGGGACG  | MICA*001      | MICA*010:01/MICA*010:02                                     |               |               | Exon 5                                        |
| GTNCNTGCTNGCCCTTCGTNTGCGCTTGCCCTTGATCGGGGCCAGAGGGANG | MICA*001      | MICA*011                                                    |               |               |                                               |
| GTTATGCTAGCCCTTCGTNTGCGCTTGCCCTTGATCGGGGCCAGAGGGACG  | MICA*001      | MICA*012:01                                                 |               |               |                                               |
| GTTATGCTAGCCCTTCGTNTGCGCTTGCCCTTGATCGGGGCCAGANGGACG  | MICA*001      | MICA*012:02                                                 |               |               |                                               |
| GTTATGCTAGCCCTTCGTNTGCGCTTGCCCTTGATCGGGGCCAGAGGGACG  | MICA*001      | MICA*012:03                                                 |               |               |                                               |
| GTNCNTGCTNGCCCTTCGNNTGCGCTTGCCCTTGATCGGGGCCAGAGGGACN | MICA*001      | MICA*013                                                    |               |               | Please see footnote 3                         |
| GTNCNTGCTNNGCCTTCGTNTGCGCTTGCCCTTGATCGGGGCCAGAGGGACN | MICA*001      | MICA*014                                                    |               |               | Please see footnote 3                         |
| GTNCNTGCTNGCCCTTCGTNTGCGCTTGCCCTTGATCGGGGCCAGAGGGACN | MICA*001      | MICA*015                                                    |               |               |                                               |
| GTTNNTNCTNNGCCTTCGNNTGCGCTTGCCCNANNCNGGGCCAGAGGGACG  | MICA*001      | MICA*016                                                    |               |               |                                               |
| GTNCNTGCTNGCCCTTCGTNTGCGCTTGCCCTTGATCGGGGCCAGAGGGACN | MICA*001      | MICA*017                                                    |               |               |                                               |
| GTTATGCTAGCCCTTCGTNTGCGCTTGCCCTTGATCGGGGCCAGAGGGACG  | MICA*001      | MICA*018:01                                                 |               |               |                                               |
| GTTATGCTAGCCCTTCGTNTGCGCTTGCCCTTGATCGGGGCCAGAGGGACG  | MICA*001      | MICA*018:02                                                 |               |               |                                               |
| GTTNNTNCTNNGCCTTCGNNTGCGCTTGCCCNANNCNGGGCCAGAGGGACG  | MICA*001      | MICA*019                                                    |               |               |                                               |
| GTNCNTGCTNNGCCTTCGNNTGCGCTTGCCCNANNCNGGGCCAGAGGGACG  | MICA*001      | MICA*022                                                    |               |               |                                               |
| GTTNNTNCTNNGCCTTCGNNTGCGCTTGCCCNANNCNGGGCCAGAGGGACG  | MICA*001      | MICA*024                                                    |               |               |                                               |
| NTTNNTNCTNNGCCTTCGTNTGCGCTTGCCCTTGATCGGGGCCAGAGGGACG | MICA*001      | MICA*025                                                    |               |               |                                               |
| GTTNNTNCTNNGCCTTCGNNTGCGCTTGCCCTTGATCGGGGCCAGAGGGACG | MICA*001      | MICA*028                                                    |               |               |                                               |
| GTTCNTGCTNGCCCTTCGTNTGCGCTTGCCCTTGATCGGGGCCAGAGGGACG | MICA*001      | MICA*029                                                    |               |               |                                               |
| GTNCNTGCTNGCCCTTCGTNTGCGCTTGCCCTTGATCGGGGCCAGAGGGANG | MICA*001      | MICA*030                                                    |               |               |                                               |
| GTTNNTNCTNNGCCTTCGTNTGCGCTTGCCCTTGATCGGGGCCAGAGGGACG | MICA*001      | MICA*031                                                    |               |               |                                               |
| GTTNNTNCTNNGCCTTCGTNTGCGCTTGCCCTTGATCGGGGCCAGAGGGACG | MICA*001      | MICA*032                                                    |               |               |                                               |
| GTTNNTNCTNNGCCTTCGNNTGCGCTTGCCCNANNCNGGGCCAGAGGGACG  | MICA*001      | MICA*033                                                    |               |               |                                               |
| GTNCNTGCTNGCCCTTCGTNTGCGCTTGCCCNANNCNGGGCCAGAGGGACG  | MICA*001      | MICA*034                                                    |               |               |                                               |
| GTNCNTGCTNGCCCTTCGTNTGCGCTTGCCCNANNCNGGGCCAGAGGGACG  | MICA*001      | MICA*035                                                    |               |               |                                               |
| GTNCNTGCTNNGCCTTCGTNTGCGCTTGCCCTTGATCGGGGCCAGAGGGACG | MICA*001      | MICA*036                                                    |               |               |                                               |
| GTTCNTGCTNGCCCTTCGTNTGCGCTTGCCCNANNCNGGGCCAGAGGGACG  | MICA*001      | MICA*037                                                    |               |               |                                               |
| GTTCNTGCTNGCCCTTCGTNTGCGCTTGCCCNANNCNGGGCCAGAGGGACG  | MICA*001      | MICA*038                                                    |               |               |                                               |
| GTTCNTGCTNGCCCTTCGTNTGCGCTTGCCCNANNCNGGGCCAGAGGGACG  | MICA*001      | MICA*039                                                    |               |               |                                               |
| GTTCNTGCTNGCCCTTCGTNTGCGCTTGCCCTTGATCGGGGCCAGAGGGACG | MICA*001      | MICA*040                                                    |               |               |                                               |
| GTNCNNGCTNNGCCTTCGTNTGCGCTTGCCCTTGATCGGGGCCAGAGGGACG | MICA*001      | MICA*041                                                    |               |               |                                               |
| GTTNNTNCTNNGCCTTCGTNTGCGCTTGCCCNANNCNGGGCCAGAGGGACG  | MICA*001      | MICA*042                                                    |               |               |                                               |
| GTTCNTGCTNGCCCTTCGTNTGCGCTTGCCCTTGATCGGGGCCAGAGGGACG | MICA*001      | MICA*043                                                    |               |               |                                               |
| GTNCNTNCTNNCNNTTCGNNTGCGCTTGCCCNANNCNGGGCCAGAGGGACG  | MICA*001      | MICA*044                                                    |               |               |                                               |
| GTTCNTGCTNGCCCTTCGTNTGCGCTTGCCCTTGATCGGGGCCAGAGGGACG | MICA*001      | MICA*045                                                    |               |               |                                               |
| GTNCNTGCTNGCCCTTCGTNTGCGCTTGCCCTTGATCGGGGCCAGAGGGACG | MICA*001      | MICA*046                                                    |               |               |                                               |
| GTNCNNGCTNNGCCTTCGTNTGCGCTTGCCCTTGATCGGGGCCAGAGGGANG | MICA*001      | MICA*047                                                    |               |               |                                               |
| GTNCNTGCTNGCCCTTCGTNTGCGCTTGCCCTTGATCGGGGCCAGAGGGACG | MICA*001      | MICA*050                                                    |               |               |                                               |
| GTTNNTNCTNNGCCTTCGTNTGCGCTTGCCCTTGATCGGGGCCAGAGGGACG | MICA*001      | MICA*051                                                    |               |               |                                               |
| GTNCNTGCTNGCCCTTCGNNTGCGCTTGCCCNANNCNGGGCCAGAGGGACG  | MICA*001      | MICA*018:02                                                 | MICA*031      |               | Insufficient data available                   |
| GTNCNTGCTNGCCCTTCGNNTGCGCTTGCCCNANNCNGGGCCAGAGGGACG  | MICA*001      | MICA*053                                                    |               |               |                                               |



|                                                          |                                                 |                                                             |                      |          |                             |
|----------------------------------------------------------|-------------------------------------------------|-------------------------------------------------------------|----------------------|----------|-----------------------------|
| GTNCGTGCTGGCCNTTCGTCTGCGCTTGCCCTTGATCGGGGCCAGAGNGACG     | MICA*002:01/MICA*020/MICA*023/MICA*052/MICA*055 | MICA*043                                                    |                      |          | Exon 5                      |
| GTGCGTGTGNCNNTTCGNCTNCGCTTGCCCNNNANNCNGGGCCAGAGGGACG     | MICA*002:01/MICA*020/MICA*023/MICA*052/MICA*055 | MICA*044                                                    |                      |          | Exon 5                      |
| GTNCGTGCTGGCCCTTTCGTCTGCGCTTGCCNCTTGATCGGGGCCNAGAGGGACG  | MICA*002:01/MICA*020/MICA*023/MICA*052/MICA*055 | MICA*045                                                    |                      |          | Exon 5                      |
| GTGCGTGCTGGCCCTTTCGTCTGCGCTTGCCCTTGATCGGGGCCAGAGGGACG    | MICA*002:01/MICA*020/MICA*023/MICA*052/MICA*055 | MICA*046                                                    |                      |          | Exon 5                      |
| GTGCGNGCTGGCCCTTTCGTCTGCGCTTGCCCTTGATCGGGGCCAGAGGGANG    | MICA*002:01/MICA*020/MICA*023/MICA*052/MICA*055 | MICA*047                                                    | MICA*030             | MICA*041 | Exon 5                      |
| GTGCGTGCTGGCCCTTTCGTCTGCGCTTGCCNCTTGATCGGGGCCAGAGGGACG   | MICA*002:01/MICA*020/MICA*023/MICA*052/MICA*055 | MICA*050                                                    |                      |          | Exon 5                      |
| GTNNGTNCGTGCCCTTTCGTCTGCGCTTGCCNCTTGATCGGGGCCAGAGGGACG   | MICA*002:01/MICA*020/MICA*023/MICA*052/MICA*055 | MICA*051                                                    |                      |          | Exon 5                      |
| GTGCGTGCTGGCCNTTCGNCTGCGCTTGCCCNNNANNNNGGGCCNAGAGGGACG   | MICA*002:01/MICA*020/MICA*023/MICA*052/MICA*055 | MICA*053                                                    |                      |          | Exon 5                      |
| NTNNGTNCGTGGCNNTTCGNCTGCGCTTGCCCNNNANNNNGGGCCNAGAGGGACG  | MICA*002:01/MICA*020/MICA*023/MICA*052/MICA*055 | MICA*054                                                    |                      |          | Exon 5                      |
| GTNNGTNCGTGGCNNTTCGNCTGCGCTTGCCCNNNANNNNGGGCCNAGAGGGACG  | MICA*002:01/MICA*020/MICA*023/MICA*052/MICA*055 | MICA*056                                                    |                      |          | Exon 5                      |
| GTNNGTNCGTGGCNNTTCGNCTGCGCTTGCCCNNNANNNNGGGCCNAGAGGGACG  | MICA*002:01/MICA*020/MICA*023/MICA*052/MICA*055 | MICA*057                                                    |                      |          | Exon 5                      |
| GTNNGTNCGTGGCNNTTCGNCTGCGCTTGCCCNNNANNNNGGGCCNAGAGGGACG  | MICA*002:01/MICA*020/MICA*023/MICA*052/MICA*055 | MICA*058                                                    |                      |          | Exon 5                      |
| GTNCGNGCTGGCCCTTTCGTCTGCGCTTGCCNCTTGATCGGGGCCNAGAGGGACG  | MICA*002:01/MICA*020/MICA*023/MICA*052/MICA*055 | MICA*059                                                    | MICA*041             | MICA*045 | Exon 5                      |
| GTNCGTGTGNCCTTTCGTCTGCGCTTGCCCTTGATCGGGGCCAGAGGNACG      | MICA*002:01/MICA*020/MICA*023/MICA*052/MICA*055 | MICA*060                                                    |                      |          | Exon 5                      |
| GTNCGTGTGNCCTTTCGTCTGCGCTTGCCCTTGATCGGGGCCANAGGGACG      | MICA*002:01/MICA*020/MICA*023/MICA*052/MICA*055 | MICA*061                                                    |                      |          | Exon 5                      |
| NTNNGTNCGTGGCNNTTCGNCTGCGCTTGCCCNNNANNNNGGGCCNAGAGGNACG  | MICA*002:01/MICA*020/MICA*023/MICA*052/MICA*055 | MICA*062                                                    |                      |          | Exon 5                      |
| GTNNGTNCGTGGCNNTTCGNCTGCGCTTGCCCNNNANNNNGGGCCNAGAGGGACG  | MICA*002:01/MICA*020/MICA*023/MICA*052/MICA*055 | MICA*063N                                                   |                      |          | Exon 5                      |
| GTNNGTNCGTGGCNNTTCGNCTGCGCTTGCCCNNNANNNNGGGCCNAGAGGGACG  | MICA*002:01/MICA*020/MICA*023/MICA*052/MICA*055 | MICA*064N                                                   |                      |          | Exon 5                      |
| NTNNGTNCGTGGCNNTTCGNCTGCGCTTGCCCNNNANNNNGGGCCNAGAGGGACG  | MICA*002:01/MICA*020/MICA*023/MICA*052/MICA*055 | MICA*065                                                    |                      |          | Exon 5                      |
| NTNNGTNCGTGGCNNTTCGNCTGCGCTTGCCCNNNANNNNGGGCCNAGAGGGACG  | MICA*002:01/MICA*020/MICA*023/MICA*052/MICA*055 | MICA*066                                                    |                      |          | Exon 5                      |
| GTNNGTNCGTGGCNNTTCGNCTGCGCTTGCCCNNNANNCNGGGCCAGAGGGACG   | MICA*002:01/MICA*020/MICA*023/MICA*052/MICA*055 | MICA*067                                                    |                      |          | Exon 5                      |
| GNGCGTGCTGGCCCTTTCGTCTGCGCTTGCCNCTTGATCGGGGCCAGAGGGACG   | MICA*002:02                                     | MICA*002:03                                                 |                      |          |                             |
| GTGCGTGCTGGCCCTTTCGTCTGCGCTTGCCNCTTGATCGGGGCCAGAGGGACG   | MICA*002:02                                     | MICA*002:04                                                 |                      |          |                             |
| GTNNGTNCGTGGCNNTTCGNCTNCGCTTGCCCNNNANNCNGGGCCAGAGGGACG   | MICA*002:02                                     | MICA*004                                                    |                      |          |                             |
| GTNNGTNCGTGGCCCTTTCGNCTGCGCTTGCCNCTNANNCNGGGCCNAGAGGGACN | MICA*002:02                                     | MICA*005                                                    |                      |          |                             |
| GTNNGTNCGTGGCNNTTCGNCTNCGCTTGCCCNNNANNCNGGGCCAGAGGGACG   | MICA*002:02                                     | MICA*006                                                    |                      |          | Please see footnote 3       |
| GTNCGTGCTGGCCCTTTCGTCTGCGCTTGCCCTTGATCGGGGCCAGAGGGACG    | MICA*002:02                                     | MICA*007:01/MICA*026                                        |                      |          | Exon 5                      |
| GTNCGTGCTGGCCCTTTCGTCTGCGCTTGCCCTTGATCGGGGCCAGAGGGACG    | MICA*002:02                                     | MICA*007:03                                                 |                      |          |                             |
| GTNCGTGCTNCGCCTTTCGTCTGCGCTTGCCNCTTGATCGGGGCCAGAGGGACG   | MICA*002:02                                     | MICA*007:04                                                 |                      |          |                             |
| GTNNGTNCGTGGCNNTTCGNCTGCGCTTGCCCNNNANNNNGGGCCNAGAGGGACG  | MICA*002:02                                     | MICA*008:01:01/MICA*008:01:02/MICA*008:04/MICA*027/MICA*048 | MICA*051             | MICA*053 | Insufficient data available |
| GTNNGTNCGTGGCCNTTCGNCTGCGCTTGCCCNNNANNNNGGGCCNAGAGGGACG  | MICA*002:02                                     | MICA*008:02                                                 |                      |          |                             |
| GTNNGTNCGTGGCCNTTCGNCTGCGCTTGCCCNNNANNNNGGGCCNAGAGGGACG  | MICA*002:02                                     | MICA*008:03                                                 |                      |          |                             |
| GTNNGTNCGTGGCNNTTCGNCTNCGCTTGCCCNNNANNCNGGGCCAGAGGGACG   | MICA*002:02                                     | MICA*009:01/MICA*049                                        |                      |          | Exon 6                      |
| GTNNGTNCGTGGCNNTTCGNCTNCGCTTGCCCNNNANNCNGGGCCAGAGGGACG   | MICA*002:02                                     | MICA*009:02                                                 |                      |          |                             |
| NTNNGTNCGTGGCNNTTCGNCTGCGCTTGCCCNNNANNNNGGGCCNAGAGGGACG  | MICA*002:02                                     | MICA*010:01/MICA*010:02                                     |                      |          | Exon 5                      |
| GTGCGTGCTGGCCCTTTCGTCTGCGCTTGCCNCTTGATCGGGGCCAGAGGGANG   | MICA*002:02                                     | MICA*011                                                    |                      |          |                             |
| GTNCGTGTGNCCTTTCGTCTGCGCTTGCCNCTTGATCGGGGCCAGAGGGACG     | MICA*002:02                                     | MICA*012:01                                                 |                      |          |                             |
| GTNCGTGTGNCCTTTCGTCTGCGCTTGCCNCTTGATCGGGGCCAGAGGGACG     | MICA*002:02                                     | MICA*012:02                                                 |                      |          |                             |
| GTNCGTGTGNCCTTTCGTCTGCGCTTGCCNCTTGATCGGGGCCAGAGGGACG     | MICA*002:02                                     | MICA*012:03                                                 |                      |          |                             |
| GTGCGTGCTGGCCNTTCGNCTGCGCTTGCCNCTTGATCGGGGCCNAGAGGGACN   | MICA*002:02                                     | MICA*013                                                    |                      |          | Please see footnote 3       |
| GTGCGTGCTGGCCNTTCGTCTGCGCTTGCCNCTTGATCGGGGCCAGAGGGACN    | MICA*002:02                                     | MICA*014                                                    |                      |          | Please see footnote 3       |
| GTGCGTGCTGGCCCTTTCGTCTGCGCTTGCCNCTTGATCGGGGCCAGAGGGACN   | MICA*002:02                                     | MICA*015                                                    |                      |          |                             |
| GTNNGTNCGTGGCNNTTCGNCTGCGCTTGCCCNNNANNNNGGGCCNAGAGGGACG  | MICA*002:02                                     | MICA*016                                                    |                      |          |                             |
| GTGCGTGCTGGCCCTTTCGTCTGCGCTTGCCNCTTGATCGGGGCCAGAGGGACN   | MICA*002:02                                     | MICA*017                                                    |                      |          |                             |
| GTNCGTGTGNCCTTTCGTCTGCGCTTGCCNCTTGATCGGGGCCAGAGGGACG     | MICA*002:02                                     | MICA*018:02                                                 |                      |          |                             |
| GTNNGTNCGTGGCNNTTCGNCTGCGCTTGCCCNNNANNNNGGGCCNAGAGGGACG  | MICA*002:02                                     | MICA*019                                                    | MICA*022             | MICA*051 | Insufficient data available |
| GTGCGTGCTGGCCNTTCGNCTGCGCTTGCCCNNNANNNNGGGCCNAGAGGGACG   | MICA*002:02                                     | MICA*022                                                    |                      |          |                             |
| GTNNGTNCGTGGCCNTTCGNCTGCGCTTGCCCNNNANNCNGGGCCAGAGGGACG   | MICA*002:02                                     | MICA*024                                                    |                      |          |                             |
| NTNNGTNCGTGGCCCTTTCGTCTGCGCTTGCCNCTTGATCGGGGCCAGAGGGACG  | MICA*002:02                                     | MICA*025                                                    |                      |          |                             |
| GTNNGTNCGTGGCCNTTCGNCTGCGCTTGCCNCTTGATCGGGGCCAGAGGGACG   | MICA*002:02                                     | MICA*028                                                    |                      |          |                             |
| GTNCGTGCTGGCCCTTTCGTCTGCGCTTGCCNCTTGATCGGGGCCAGAGGGACG   | MICA*002:02                                     | MICA*029                                                    |                      |          |                             |
| GTGCGTGCTGGCCCTTTCGTCTGCGCTTGCCNCTTGATCGGGGCCAGAGGGANG   | MICA*002:02                                     | MICA*030                                                    |                      |          |                             |
| GTNNGTNCGTGGCCCTTTCGTCTGCGCTTGCCNCTTGATCGGGGCCAGAGGGACG  | MICA*002:02                                     | MICA*031                                                    |                      |          |                             |
| GTNNGTNCGTGGCNNTTCGTCTGCGCTTGCCNCTTGATCGGGGCCAGAGGGACG   | MICA*002:02                                     | MICA*032                                                    |                      |          |                             |
| GTNNGTNCGTGGCCNTTCGNCTGCGCTTGCCCNNNANNNNGGGCCNAGAGGGACG  | MICA*002:02                                     | MICA*033                                                    |                      |          |                             |
| GTGCGTGCTGGCCCTTTCGTCTGCGCTTGCCNCTTGATCGGGGCCAGAGGGACG   | MICA*002:02                                     | MICA*034                                                    |                      |          |                             |
| GTGCGTGCTGGCCCTTTCGTCTGCGCTTGCCCNNNANNNNGGGCCNAGAGGGACG  | MICA*002:02                                     | MICA*035                                                    |                      |          |                             |
| GTGCGTGCTGGCCNTTCGTCTGCGCTTGCCNCTTGATCGGGGCCAGAGGGACG    | MICA*002:02                                     | MICA*036                                                    |                      |          |                             |
| GTNCGTGCTGGCCCTTTCGTCTGCGCTTGCCCNNNANNNNGGGCCNAGAGGGACG  | MICA*002:02                                     | MICA*037                                                    | MICA*007:01/MICA*026 | MICA*035 | Insufficient data available |



|                                                           |             |                                                             |
|-----------------------------------------------------------|-------------|-------------------------------------------------------------|
| GNNNGTNCNTGNCNTNTCGTCTGCGCTTGCCCTTGATCGGGGCCAGAGGGACG     | MICA*002:03 | MICA*032                                                    |
| GNNNGTNCNTGNCNNTTCGNCNGCGCTTGCCCNNNANNNNGGGCCNAGAGGGACG   | MICA*002:03 | MICA*033                                                    |
| GNGCGTGCTGGCCCTTTCGCTCTGCGCTTGCCCNNNANNCNGGGCCAGAGGGACG   | MICA*002:03 | MICA*034                                                    |
| GNGCGTGCTGGCCCTTTCGCTCTGCGCTTGCCCNNNANNNNGGGCCNAGAGGGACG  | MICA*002:03 | MICA*035                                                    |
| GNGCGTGCTGGCCNNTTCGCTCTGCGNTTGCCCTTGATCGGGGCCAGAGGGACG    | MICA*002:03 | MICA*036                                                    |
| GNNCGTGCTGGCCCTTTCGCTCTGCGCTTGCCCNNNANNNNGGGCCNAGAGGGACG  | MICA*002:03 | MICA*037                                                    |
| GNNCGTGCTGGCCCTTTCGCTCTGCGCTTGCCCNNNANNCNGGGCCAGAGGGACG   | MICA*002:03 | MICA*038                                                    |
| GNNCGTGCTGGCCCTTTCGCTCTGCGCTTGCCCNNNANNNNGGGCCNAGAGGGACG  | MICA*002:03 | MICA*039                                                    |
| GNNCGTGCTGGCCCTTTCGNTGCGCTTGCCCTTGATCGGGGCCAGAGGGACG      | MICA*002:03 | MICA*040                                                    |
| GNGCGNGCTGGCCCTTTCGCTCTGCGCTTGCCCTTGATCGGGGCCAGAGGGACG    | MICA*002:03 | MICA*041                                                    |
| GNNNGTNCNTGGCCCTTTCGCTCTGCGCTTGCCCNNNANNNNGGGCCNAGAGGGACG | MICA*002:03 | MICA*042                                                    |
| GNNCGTGCTGGCCNTTCGCTCTGCGCTTGCCCTTGATCGGGGCCAGAGNGACG     | MICA*002:03 | MICA*043                                                    |
| GNGCGTNCNTGNCNNTTCGNTGCGCTTGCCCNNNANNCNGGGCCAGAGGGACG     | MICA*002:03 | MICA*044                                                    |
| GNNCGTGCTGGCCCTTTCGCTCTGCGCTTGCCCTTGATCGGGGCCNAGAGGGACG   | MICA*002:03 | MICA*045                                                    |
| GNGCGTGCTGGCCCTTTCGCTCTGCGCTTGCCCTTGNTCGGGGCCAGAGGGACG    | MICA*002:03 | MICA*046                                                    |
| GNGCGNGCTGGCCCTTTCGCTCTGCGCTTGCCCTTGATCGGGGCCAGAGGGANG    | MICA*002:03 | MICA*047                                                    |
| GNGCGTGCTGGCCCTTTCGCTCTGCGCTTGCCCTTGATCGGGGCCAGAGGGACG    | MICA*002:03 | MICA*050                                                    |
| GNNNGTNCNTGGCCCTTTCGCTCTGCGCTTGCCCTTGATCGGGGCCAGAGGGACG   | MICA*002:03 | MICA*051                                                    |
| GNGCGTGCTGGCCNTTCGNTGCGCTTGCCCNNNANNNNGGGCCNAGAGGGACG     | MICA*002:03 | MICA*053                                                    |
| GNNNGTNCNTGGCCNNTTCGNTGCGCTTGCCCNNNANNNNGGGCCNAGAGGGACG   | MICA*002:03 | MICA*054                                                    |
| GNNNGTNCNTGGCCNNTTCGNTGCGCTTGCCCNNNANNNNGGGCCNAGAGGGACG   | MICA*002:03 | MICA*056                                                    |
| GNNNGTNCNTGGCCNNTTCGNTGCGCTTGCCCNNNANNNNGGGCCAGAGGGACG    | MICA*002:03 | MICA*057                                                    |
| GNNNGTNCNTGGCCNNTTCGNTGCGCTTGCCCNNNANNNNGGGCCNAGAGGNACG   | MICA*002:03 | MICA*058                                                    |
| GNNCGNGCTGGCCCTTTCGCTCTGCGCTTGCCCTTGATCGGGGCCNAGAGGGACG   | MICA*002:03 | MICA*059                                                    |
| GNNCNTGCTNGCCNTTCGCTCTGCGCTTGCCCTTGATCGGGGCCAGAGGNACG     | MICA*002:03 | MICA*060                                                    |
| GNNCNTGCTNGCCNTTCGCTCTGCGCTTGCCCTTGATCGGGGCCANAGAGGACG    | MICA*002:03 | MICA*061                                                    |
| NNNNGTNCNTGGCCNNTTCGNTGCGCTTGCCCNNNANNNNGGGCCNAGAGGNACG   | MICA*002:03 | MICA*062                                                    |
| GNNNGTNCNTGGCCNNTTCGNTGCGCTTGCCCNNNANNNNGGGCCNAGAGGGACG   | MICA*002:03 | MICA*063N                                                   |
| GNNNGTNCNTGGCCNNTTCGNTGCGCTTGCCCNNNANNNNGGGCCNAGAGGGACG   | MICA*002:03 | MICA*064N                                                   |
| NNNNGTNCNTGGCCNNTTCGNTGCGCTTGCCCNNNANNNNGGGCCNAGAGGGACG   | MICA*002:03 | MICA*065                                                    |
| NNNNGTNCNTGGCCNNTTCGNTGCGCTTGCCCNNNANNNNGGGCCNAGAGGGACG   | MICA*002:03 | MICA*066                                                    |
| GNNNGTNCNTGNCNNTTCGNTGCGCTTGCCCNNNANNCNGGGCCAGAGGGACG     | MICA*002:03 | MICA*067                                                    |
| GTNNGTNCNTGNCNNTTCNNTGCGCTTGCCCNNNANNCNGGGCCAGAGGGACG     | MICA*002:04 | MICA*004                                                    |
| GTNNGTNCNTGCGCTTTCNNTGCGCTTGCCCTTNANNCNGGGCCNAGAGGGACN    | MICA*002:04 | MICA*005                                                    |
| GTNNGTNCNTGNNNTTCNNTGCGCTTGCCCNNNANNCNGGGCCAGAGGGACG      | MICA*002:04 | MICA*006                                                    |
| GTNCGTGCTGGCCCTTTCNTCTGCGCTTGCCCTTGATCGGGGCCAGAGGGACG     | MICA*002:04 | MICA*007:01/MICA*026                                        |
| GTNCGTGCTGGCCCTTTCNTCTGCGCTTGCCCTTGATCGGGGCCAGAGGGACG     | MICA*002:04 | MICA*007:02                                                 |
| GTNCGTGCTGGCCCTTTCNTCTGCGCTTGCCCTTGATCGGGGCCAGAGGGACG     | MICA*002:04 | MICA*007:03                                                 |
| GTNCGTGCTGGCCCTTTCNTCTGCGCTTGCCCTTGATCGGGGCCAGAGGGACG     | MICA*002:04 | MICA*007:04                                                 |
| GTNNGTNCNTGGCCNNTTCNNTGCGCTTGCCCNNNANNNNGGGCCNAGAGGGACG   | MICA*002:04 | MICA*008:01:01/MICA*008:01:02/MICA*008:04/MICA*027/MICA*048 |
| GTNNGTNCNTGGCCNNTTCNNTGCGCTTGCCCNNNANNNNGGGCCNAGAGGGACG   | MICA*002:04 | MICA*008:02                                                 |
| GTNNGTNCNTGGCCNNTTCNNTGCGCTTGCCCNNNANNNNGGGCCNAGAGGGACG   | MICA*002:04 | MICA*008:03                                                 |
| GTNNGTNCNTGGCCNNTTCNNTGCGCTTGCCCNNNANNCNGGGCCAGAGGGACG    | MICA*002:04 | MICA*009:01/MICA*049                                        |
| GTNNGTNCNTGGCCNNTTCNNTGCGCTTGCCCNNNANNCNGGGCCAGAGGGACG    | MICA*002:04 | MICA*009:02                                                 |
| NTNNGTNCNTGGCCNNTTCNNTGCGCTTGCCCNNNANNNNGGGCCNAGAGGGACG   | MICA*002:04 | MICA*010:01/MICA*010:02                                     |
| GTGCGTGCTGGCCCTTTCNTCTGCGCTTGCCCTTGATCGGGGCCAGAGGGANG     | MICA*002:04 | MICA*011                                                    |
| GTNCGTGCTGCGCTTTCNTCTGCGCTTGCCCTTGATCGGGGCCAGAGGGACG      | MICA*002:04 | MICA*012:01                                                 |
| GTNCGTGCTGCGCTTTCNTCTGCGCTTGCCCTTGATCGGGGCCAGAGGGACG      | MICA*002:04 | MICA*012:02                                                 |
| GTNCGTGCTGCGCTTTCNTCTGCGCTTGCCCTTGATCGGGGCCAGAGGGACG      | MICA*002:04 | MICA*012:03                                                 |
| GTGCGTGCTGGCCNNTTCNNTGCGCTTGCCCTTGATCGGGGCCNAGAGGGACN     | MICA*002:04 | MICA*013                                                    |
| GTGCGTGCTGNCNNTTCNNTGNGCTTGCCCTTGATCGGGGCCAGAGGGACN       | MICA*002:04 | MICA*014                                                    |
| GTGCGTGCTGGCCCTTTCNTCTGNGCTTGCCCTTGATCGGGGCCAGAGGGACN     | MICA*002:04 | MICA*015                                                    |
| GTNNGTNCNTGGCCNNTTCNNTGCGCTTGCCCNNNANNNNGGGCCNAGAGGGACG   | MICA*002:04 | MICA*016                                                    |
| GTGCGTGCTGGCCCTTTCNTCTGCGCTTGCCCTTGATCGGGGCCAGAGGGACN     | MICA*002:04 | MICA*017                                                    |
| GTNCGTGCTGGCCCTTTCNTCTGCGCTTGCCCTTGATCGGGGCCAGAGGGACG     | MICA*002:04 | MICA*018:01                                                 |
| GTNCGTGCTGGCCCTTTCNTCTGCGCTTGCCCTTGATCGGGGCCAGAGGGACG     | MICA*002:04 | MICA*018:02                                                 |
| GTNNGTNCNTGGCCNNTTCNNTGCGCTTGCCCNNNANNNNGGGCCNAGAGGGACG   | MICA*002:04 | MICA*019                                                    |
| GTGCGTGCTGGCCNNTTCNNTGCGCTTGCCCNNNANNNNGGGCCNAGAGGGACG    | MICA*002:04 | MICA*022                                                    |
| GTNNGTNCNTGGCCNNTTCNNTGCGCTTGCCCNNNANNCNGGGCCAGAGGGACG    | MICA*002:04 | MICA*024                                                    |

Please see footnote 3

Exon 5

Exons 1 and 5 and intron 1

Exon 6

Exon 5

Please see footnote 3

Please see footnote 3













|                                                         |             |                                                             |          |          |                             |
|---------------------------------------------------------|-------------|-------------------------------------------------------------|----------|----------|-----------------------------|
| GTNCGTGCTGNCNNTTTCGTCTGNGCTTGCCCTTGATCGGGGCCAGAGGGACN   | MICA*007:02 | MICA*014                                                    |          |          |                             |
| GTNCGTGCTGGCCCTTTCGTCTGNGCTTGCCCTTGATCGGGGCCAGAGGGACN   | MICA*007:02 | MICA*015                                                    |          |          | Please see footnote 3       |
| GTTNNGTCTGGCCNNTTCGNCTGCGCTTGCCCNNNANNNNGGCCNAGAGGGACG  | MICA*007:02 | MICA*016                                                    |          |          |                             |
| GTNCGTGCTGGCCCTTTCGTCTGCGCTNGCCCTTGATCGGGGCCAGAGGGACN   | MICA*007:02 | MICA*017                                                    |          |          |                             |
| GTTNCGTCTGNGCCCTTTCGTCTGCGCTTGCCCTTGATCGGGGCCAGAGGGACG  | MICA*007:02 | MICA*018:01                                                 |          |          |                             |
| GTTNNGTCTGGCCNNTTCGNCTGCGCTTGCCCNNNANNNNGGCCNAGAGGGACG  | MICA*007:02 | MICA*019                                                    |          |          |                             |
| GTNCGTGCTGGCCNNTTCGNCTGCGCTTGCCCNNNANNNNGGCCNAGAGGGACG  | MICA*007:02 | MICA*022                                                    |          |          |                             |
| GTTNNGTCTGGCCNNTTCGNCTGCGCTTGCCCNNNANNNNGGCCNAGAGGGACG  | MICA*007:02 | MICA*024                                                    |          |          |                             |
| NTTNGTCTGGCCCTTTCGTCTGCGCTTGCCCTTGATCGGGGCCAGAGGGACG    | MICA*007:02 | MICA*025                                                    | MICA*028 | MICA*038 | Insufficient data available |
| GTTNNGTCTGGCCNNTTCGNCTGCGCTTGCCCTTGATCGGGGCCAGAGGGACG   | MICA*007:02 | MICA*028                                                    |          |          |                             |
| GTTCTGTCTGGCCCTTTCGTCTGCGCTTGCCCTTGATCGGGGCCAGAGGGACG   | MICA*007:02 | MICA*029                                                    |          |          |                             |
| GTNCGTGCTGGCCCTTTCGTCTGCGCTTGCCCTTGATCGGGGCCAGAGGGANG   | MICA*007:02 | MICA*030                                                    |          |          |                             |
| GTTNNGTCTGGCCCTTTCGTCTGCGCTTGCCCTTGATCGGGGCCAGAGGGACG   | MICA*007:02 | MICA*031                                                    |          |          |                             |
| GTTNNGTCTGNCNNTTCGTCTGCGCTTGCCCTTGATCGGGGCCAGAGGGACG    | MICA*007:02 | MICA*032                                                    |          |          |                             |
| GTTNNGTCTGGCCNNTTCGNCTGCGCTTGCCCNNNANNNNGGCCNAGAGGGACG  | MICA*007:02 | MICA*033                                                    |          |          |                             |
| GTNCGTGCTGGCCCTTTCGTCTGCGCTTGCCCNNNANNNNGGCCNAGAGGGACG  | MICA*007:02 | MICA*034                                                    |          |          |                             |
| GTNCGTGCTGGCCNNTTCGTCTGCGCTTGCCCTTGATCGGGGCCAGAGGGACG   | MICA*007:02 | MICA*036                                                    |          |          |                             |
| GTTCTGTCTGGCCCTTTCGTCTGCGCTTGCCCNNNANNNNGGCCNAGAGGGACG  | MICA*007:02 | MICA*037                                                    |          |          |                             |
| GTTCTGTCTGGCCCTTTCGTCTGCGCTTGCCCNNNANNNNGGCCNAGAGGGACG  | MICA*007:02 | MICA*038                                                    |          |          |                             |
| GTTCTGTCTGGCCCTTTCGTCTGCGCTTGCCCNNNANNNNGGCCNAGAGGGACG  | MICA*007:02 | MICA*039                                                    |          |          |                             |
| GTTCTGTCTGGCCCTTTCGTCTGCGCTTGCCCTTGATCGGGGCCAGAGGGACG   | MICA*007:02 | MICA*040                                                    |          |          |                             |
| GTNCGNGCTGGCCCTTTCGTCTGCGCTTGCCCTTGATCGGGGCCAGAGGGACG   | MICA*007:02 | MICA*041                                                    |          |          |                             |
| GTTNNGTCTGGCCCTTTCGTCTGCGCTTGCCCNNNANNNNGGCCNAGAGGGACG  | MICA*007:02 | MICA*042                                                    |          |          |                             |
| GTTCTGTCTGGCCCTTTCGTCTGCGCTTGCCCTTGATCGGGGCCAGAGGGACG   | MICA*007:02 | MICA*043                                                    |          |          |                             |
| GTNCGTCTGNCNNTTCGNCTGCGCTTGCCCNNNANNNNGGCCNAGAGGGACG    | MICA*007:02 | MICA*044                                                    |          |          |                             |
| GTTCTGTCTGGCCCTTTCGTCTGCGCTTGCCCTTGATCGGGGCCNAGAGGGACG  | MICA*007:02 | MICA*045                                                    |          |          |                             |
| GTNCGTGCTGGCCCTTTCGTCTGCGCTTGCCCTTGATCGGGGCCAGAGGGACG   | MICA*007:02 | MICA*046                                                    |          |          |                             |
| GTNCGNGCTGGCCCTTTCGTCTGCGCTTGCCCTTGATCGGGGCCAGAGGGANG   | MICA*007:02 | MICA*047                                                    |          |          |                             |
| GTNCGTGCTGGCCCTTTCGTCTGCGCTTGCCCTTGATCGGGGCCAGAGGGACG   | MICA*007:02 | MICA*050                                                    |          |          |                             |
| GTTNNGTCTGGCCCTTTCGTCTGCGCTTGCCCNNNANNNNGGCCNAGAGGGACG  | MICA*007:02 | MICA*051                                                    |          |          |                             |
| GTNCGTGCTGGCCNNTTCGNCTGCGCTTGCCCNNNANNNNGGCCNAGAGGGACG  | MICA*007:02 | MICA*053                                                    |          |          |                             |
| NTTNGTCTGGCCNNTTCGNCTGCGCTTGCCCNNNANNNNGGCCNAGAGGGANG   | MICA*007:02 | MICA*054                                                    |          |          |                             |
| GTTNNGTCTGGCCNNTTCGNCTGCGCTTGCCCNNNANNNNGGCCNAGAGGGACG  | MICA*007:02 | MICA*056                                                    |          |          |                             |
| GTTNNGTCTGGCCNNTTCGNCTGCGCTTGCCCNNNANNNNGGCCNAGAGGGACG  | MICA*007:02 | MICA*057                                                    |          |          |                             |
| GTTNNGTCTGGCCNNTTCGNCTGCGCTTGCCCNNNANNNNGGCCNAGAGGNACG  | MICA*007:02 | MICA*058                                                    |          |          |                             |
| GTTNCGNGCTGGCCCTTTCGTCTGCGCTTGCCCTTGATCGGGGCCNAGAGGGACG | MICA*007:02 | MICA*059                                                    |          |          |                             |
| GTTNCTGTGNGCCCTTTCGTCTGCGCTTGCCCTTGATCGGGGCCAGAGGNACG   | MICA*007:02 | MICA*060                                                    |          |          |                             |
| GTTNCTGTGNGCCCTTTCGTCTGCGCTTGCCCTTGATCGGGGCCANAGGGACG   | MICA*007:02 | MICA*061                                                    |          |          |                             |
| NTTNGTCTGGCCNNTTCGNCTGCGCTTGCCCNNNANNNNGGCCNAGAGGNACG   | MICA*007:02 | MICA*062                                                    |          |          |                             |
| GTTNNGTCTGGCCNNTTCGNCTGCGCTTGCCCNNNANNNNGGCCNAGAGGGACG  | MICA*007:02 | MICA*063N                                                   |          |          |                             |
| GTTNNGTCTGGCCNNTTCGNCTGCGCTTGCCCNNNANNNNGGCCNAGAGGGACG  | MICA*007:02 | MICA*064N                                                   |          |          |                             |
| NTTNGTCTGGCCNNTTCGNCTGCGCTTGCCCNNNANNNNGGCCNAGAGGGACG   | MICA*007:02 | MICA*065                                                    |          |          |                             |
| NTTNGTCTGGCCNNTTCGNCTGCGCTTGCCCNNNANNNNGGCCNAGAGGGACG   | MICA*007:02 | MICA*066                                                    |          |          |                             |
| GTTNNGTCTGNCNNTTCGNCTGCGCTTGCCCNNNANNNNGGCCNAGAGGGACG   | MICA*007:02 | MICA*067                                                    |          |          |                             |
| GTTCTGTCTGNGCCCTTTCGTCTGCGCTTGCCCTTGATCGGGGCCAGAGGGACG  | MICA*007:03 | MICA*007:04                                                 |          |          |                             |
| GTTNNGTCTGGCCNNTTCGNCTGCGCTTGCCCNNNANNNNGGCCNAGAGGGACG  | MICA*007:03 | MICA*008:01:01/MICA*008:01:02/MICA*008:04/MICA*027/MICA*048 |          |          | Exons 1 and 5 and intron 1  |
| GTTNNGTCTGGCCNNTTCGNCTGCGCTTGCCCNNNANNNNGGCCNAGAGGGACG  | MICA*007:03 | MICA*008:02                                                 |          |          |                             |
| GTTNNGTCTGGCCNNTTCGNCTGCGCTTGCCCNNNANNNNGGCCNAGAGGGACG  | MICA*007:03 | MICA*008:03                                                 |          |          |                             |
| GTTNNGTCTGGCCNNTTCGNCTGCGCTTGCCCNNNANNNNGGCCNAGAGGGACG  | MICA*007:03 | MICA*009:02                                                 |          |          |                             |
| NTTNGTCTGGCCNNTTCGNCTGCGCTTGCCCNNNANNNNGGCCNAGAGGGACG   | MICA*007:03 | MICA*010:01/MICA*010:02                                     |          |          | Exon 5                      |
| GTNCGTGCTGGCCCTTTCGTCTGCGCTTGCCCTTGATCGGGGCCAGAGGGANG   | MICA*007:03 | MICA*011                                                    |          |          |                             |
| GTTNCGTCTGNGCCCTTTCGTCTGCGCTTGCCCTTGATCGGGGCCAGAGGGACG  | MICA*007:03 | MICA*012:01                                                 |          |          |                             |
| GTTNCGTCTGNGCCCTTTCGTCTGCGCTTGCCCTTGATCGGGGCCAGAGGGACG  | MICA*007:03 | MICA*012:02                                                 |          |          |                             |
| GTTNCTGNCNNGCCCTTTCGTCTGCGCTTGCCCTTGATCGGGGCCAGAGGGACG  | MICA*007:03 | MICA*012:03                                                 |          |          |                             |
| GTNCGTGCTGGCCNNTTCGNCTGCGCTTGCCCTTGATCGGGGCCNAGAGGGACN  | MICA*007:03 | MICA*013                                                    |          |          | Please see footnote 3       |
| GTNCGTGCTGNCNNTTCGTCTGCGCTTGCCCTTGATCGGGGCCAGAGGGACN    | MICA*007:03 | MICA*014                                                    |          |          | Please see footnote 3       |
| GTNCGTGCTGGCCCTTTCGTCTGCGCTTGCCCTTGATCGGGGCCAGAGGGACN   | MICA*007:03 | MICA*015                                                    |          |          |                             |
| GTTNNGTCTGGCCNNTTCGNCTGCGCTTGCCCNNNANNNNGGCCNAGAGGGACG  | MICA*007:03 | MICA*016                                                    |          |          |                             |
| GTNCGTGCTGGCCCTTTCGTCTGCGCTTGCCCTTGATCGGGGCCAGAGGGACN   | MICA*007:03 | MICA*017                                                    |          |          |                             |

|                                                      |             |                                                             |                            |
|------------------------------------------------------|-------------|-------------------------------------------------------------|----------------------------|
| GTTCNTGCTNGCCCTTCGTCTGCNCTTGATCGGGGCCAGAGGGACG       | MICA*007:03 | MICA*018:01                                                 |                            |
| GTTTNTGCTNGCCCTTCGTCTGCNCTTGCTCTTGATCGGGGCCAGAGGGACG | MICA*007:03 | MICA*018:02                                                 |                            |
| GTNTNGTCTGGCCNNTTCGNCTGCNCTTGATCGGGGCCAGAGGGACG      | MICA*007:03 | MICA*019                                                    |                            |
| GTNCGTGCTGGCCNNTTCGNCTGCNCTTGATCGGGGCCAGAGGGACG      | MICA*007:03 | MICA*022                                                    |                            |
| GTTTNGTCTGGCCNNTTCGNCTGCNCTTGATCGGGGCCAGAGGGACG      | MICA*007:03 | MICA*024                                                    |                            |
| NTTNGTCTGGCCCTTCGTCTGCNCTTGATCGGGGCCAGAGGGACG        | MICA*007:03 | MICA*025                                                    |                            |
| GTTTNGTCTGGCCNNTTCGNCTGCNCTTGATCGGGGCCAGAGGGACG      | MICA*007:03 | MICA*028                                                    |                            |
| GTTTNGTCTGGCCCTTCGTCTGCNCTTGATCGGGGCCAGAGGGACG       | MICA*007:03 | MICA*029                                                    |                            |
| GTNCGTGCTGGCCCTTCGTCTGCNCTTGATCGGGGCCAGAGGGACG       | MICA*007:03 | MICA*030                                                    |                            |
| GTTTNGTCTGGCCCTTCGTCTGCNCTTGATCGGGGCCAGAGGGACG       | MICA*007:03 | MICA*031                                                    |                            |
| GTTTNGTCTGNCNNTTCGTCTGCNCTTGATCGGGGCCAGAGGGACG       | MICA*007:03 | MICA*032                                                    |                            |
| GTTTNGTCTGGCCNNTTCGNCTGCNCTTGATCGGGGCCAGAGGGACG      | MICA*007:03 | MICA*033                                                    |                            |
| GTNCGTGCTGGCCCTTCGTCTGCNCTTGATCGGGGCCAGAGGGACG       | MICA*007:03 | MICA*034                                                    |                            |
| GTNCGTGCTGGCCCTTCGTCTGCNCTTGATCGGGGCCAGAGGGACG       | MICA*007:03 | MICA*035                                                    |                            |
| GTNCGTGCTGGCCNNTTCGTCTGCNCTTGATCGGGGCCAGAGGGACG      | MICA*007:03 | MICA*036                                                    |                            |
| GTTTNGTCTGGCCCTTCGTCTGCNCTTGATCGGGGCCAGAGGGACG       | MICA*007:03 | MICA*037                                                    |                            |
| GTTTNGTCTGGCCCTTCGTCTGCNCTTGATCGGGGCCAGAGGGACG       | MICA*007:03 | MICA*038                                                    |                            |
| GTTTNGTCTGGCCCTTCGTCTGCNCTTGATCGGGGCCAGAGGGACG       | MICA*007:03 | MICA*039                                                    |                            |
| GTTTNGTCTGGCCCTTCGTCTGCNCTTGATCGGGGCCAGAGGGACG       | MICA*007:03 | MICA*040                                                    |                            |
| GTNCGTGCTGGCCCTTCGTCTGCNCTTGATCGGGGCCAGAGGGACG       | MICA*007:03 | MICA*041                                                    |                            |
| GTTTNGTCTGGCCCTTCGTCTGCNCTTGATCGGGGCCAGAGGGACG       | MICA*007:03 | MICA*042                                                    |                            |
| GTTTNGTCTGGCCCTTCGTCTGCNCTTGATCGGGGCCAGAGGGACG       | MICA*007:03 | MICA*043                                                    |                            |
| GTNCGTGCTGNCNNTTCGNCTGCNCTTGATCGGGGCCAGAGGGACG       | MICA*007:03 | MICA*044                                                    |                            |
| GTTTNGTCTGGCCCTTCGTCTGCNCTTGATCGGGGCCAGAGGGACG       | MICA*007:03 | MICA*045                                                    |                            |
| GTNCGTGCTGGCCCTTCGTCTGCNCTTGATCGGGGCCAGAGGGACG       | MICA*007:03 | MICA*046                                                    |                            |
| GTNCGTGCTGGCCCTTCGTCTGCNCTTGATCGGGGCCAGAGGGACG       | MICA*007:03 | MICA*047                                                    |                            |
| GTNCGTGCTGGCCCTTCGTCTGCNCTTGATCGGGGCCAGAGGGACG       | MICA*007:03 | MICA*050                                                    |                            |
| GTTTNGTCTGGCCCTTCGTCTGCNCTTGATCGGGGCCAGAGGGACG       | MICA*007:03 | MICA*051                                                    |                            |
| GTNCGTGCTGGCCNNTTCGNCTGCNCTTGATCGGGGCCAGAGGGACG      | MICA*007:03 | MICA*053                                                    |                            |
| NTTNGTCTGGCCNNTTCGNCTGCNCTTGATCGGGGCCAGAGGGACG       | MICA*007:03 | MICA*054                                                    |                            |
| GTTTNGTCTGGCCNNTTCGNCTGCNCTTGATCGGGGCCAGAGGGACG      | MICA*007:03 | MICA*056                                                    |                            |
| GTTTNGTCTGGCCNNTTCGNCTGCNCTTGATCGGGGCCAGAGGGACG      | MICA*007:03 | MICA*057                                                    |                            |
| GTTTNGTCTGGCCNNTTCGNCTGCNCTTGATCGGGGCCAGAGGGACG      | MICA*007:03 | MICA*058                                                    |                            |
| GTTTNGTCTGGCCCTTCGTCTGCNCTTGATCGGGGCCAGAGGGACG       | MICA*007:03 | MICA*059                                                    |                            |
| GTTTNGTCTGGCCCTTCGTCTGCNCTTGATCGGGGCCAGAGGGACG       | MICA*007:03 | MICA*060                                                    |                            |
| GTTTNGTCTGGCCCTTCGTCTGCNCTTGATCGGGGCCAGAGGGACG       | MICA*007:03 | MICA*061                                                    |                            |
| NTTNGTCTGGCCNNTTCGNCTGCNCTTGATCGGGGCCAGAGGGACG       | MICA*007:03 | MICA*062                                                    |                            |
| GTTTNGTCTGGCCNNTTCGNCTGCNCTTGATCGGGGCCAGAGGGACG      | MICA*007:03 | MICA*063N                                                   |                            |
| GTTTNGTCTGGCCNNTTCGNCTGCNCTTGATCGGGGCCAGAGGGACG      | MICA*007:03 | MICA*064N                                                   |                            |
| NTTNGTCTGGCCNNTTCGNCTGCNCTTGATCGGGGCCAGAGGGACG       | MICA*007:03 | MICA*065                                                    |                            |
| NTTNGTCTGGCCNNTTCGNCTGCNCTTGATCGGGGCCAGAGGGACG       | MICA*007:03 | MICA*066                                                    |                            |
| GTTTNGTCTGNCNNTTCGNCTGCNCTTGATCGGGGCCAGAGGGACG       | MICA*007:03 | MICA*067                                                    |                            |
| GTTTNGTCTGNCNNTTCGNCTGCNCTTGATCGGGGCCAGAGGGACG       | MICA*007:04 | MICA*008:01:01/MICA*008:01:02/MICA*008:04/MICA*027/MICA*048 | Exons 1 and 5 and intron 1 |
| GTTTNGTCTGNCNNTTCGNCTGCNCTTGATCGGGGCCAGAGGGACG       | MICA*007:04 | MICA*008:02                                                 |                            |
| GTTTNGTCTGNCNNTTCGNCTGCNCTTGATCGGGGCCAGAGGGACG       | MICA*007:04 | MICA*008:03                                                 |                            |
| GTTTNGTCTGNCNNTTCGNCTGCNCTTGATCGGGGCCAGAGGGACG       | MICA*007:04 | MICA*009:01/MICA*049                                        | Exon 6                     |
| GTTTNGTCTGNCNNTTCGNCTGCNCTTGATCGGGGCCAGAGGGACG       | MICA*007:04 | MICA*009:02                                                 |                            |
| NTTNGTCTGNCNNTTCGNCTGCNCTTGATCGGGGCCAGAGGGACG        | MICA*007:04 | MICA*010:01/MICA*010:02                                     | Exon 5                     |
| GTNCGTGCTNGCCCTTCGTCTGCNCTTGATCGGGGCCAGAGGGACG       | MICA*007:04 | MICA*011                                                    |                            |
| GTTTNGTCTAGCCCTTCGTCTGCNCTTGATCGGGGCCAGAGGGACG       | MICA*007:04 | MICA*012:01                                                 |                            |
| GTTTNGTCTAGCCCTTCGTCTGCNCTTGATCGGGGCCAGAGGGACG       | MICA*007:04 | MICA*012:02                                                 |                            |
| GTTTNGTCTAGCCCTTCGTCTGCNCTTGATCGGGGCCAGAGGGACG       | MICA*007:04 | MICA*012:03                                                 |                            |
| GTNCGTGCTNGCCNNTTCGNCTGCNCTTGATCGGGGCCAGAGGGACG      | MICA*007:04 | MICA*013                                                    |                            |
| GTNCGTGCTNCCNNTTCGTCTGCNCTTGATCGGGGCCAGAGGGACG       | MICA*007:04 | MICA*014                                                    | Please see footnote 3      |
| GTNCGTGCTNGCCCTTCGTCTGCNCTTGATCGGGGCCAGAGGGACG       | MICA*007:04 | MICA*015                                                    | Please see footnote 3      |
| GTTTNGTCTGNCNNTTCGNCTGCNCTTGATCGGGGCCAGAGGGACG       | MICA*007:04 | MICA*016                                                    |                            |
| GTNCGTGCTNGCCCTTCGTCTGCNCTTGATCGGGGCCAGAGGGACG       | MICA*007:04 | MICA*017                                                    |                            |
| GTTTNGTCTAGCCCTTCGTCTGCNCTTGATCGGGGCCAGAGGGACG       | MICA*007:04 | MICA*018:01                                                 |                            |
| GTTTNGTCTAGCCCTTCGTCTGCNCTTGATCGGGGCCAGAGGGACG       | MICA*007:04 | MICA*018:02                                                 |                            |





|                                                      |             |                         |          |                                      |
|------------------------------------------------------|-------------|-------------------------|----------|--------------------------------------|
| GTNNGTACTGGCCNTTCGNCTGCGCTTGCCCNANNNNGGGNCNGAGGGANG  | MICA*008:02 | MICA*030                |          |                                      |
| GTTTGACTGGCCNTTCGNCTGCGCTTGCCCNANNNNGGGNCNGAGGGACG   | MICA*008:02 | MICA*031                |          |                                      |
| GTTTGACTGNCNNTTCGNCTGCGCTTGCCCNANNNNGGGNCNGAGGGACG   | MICA*008:02 | MICA*032                |          |                                      |
| GTTTGACTGGCCNTTCGCCNGCGCTTGCCCCCAACTCGGGNCGGAGGGACG  | MICA*008:02 | MICA*033                |          |                                      |
| GTNNGTACTGGCCNTTCGNCTGCGCTTGCCCCCAACNCGGGNCNGAGGGACG | MICA*008:02 | MICA*034                |          |                                      |
| GTNNGTACTGGCCNTTCGNCTGCGCTTGCCCCCAACTCGGGNCGGAGGGACG | MICA*008:02 | MICA*035                | MICA*042 | MICA*053 Insufficient data available |
| GTNNGTACTGGCCNTTCGNCTGCGNTTGCCCNANNNNGGGNCNGAGGGACG  | MICA*008:02 | MICA*036                |          |                                      |
| GTTNGTACTGGCCNTTCGNCTGCGCTTGCCCCCAACTCGGGNCGGAGGGACG | MICA*008:02 | MICA*037                |          |                                      |
| GTNNGTACTGGCCNTTCGNCTGCGCTTGCCCCCAACNCGGGNCNGAGGGACG | MICA*008:02 | MICA*038                |          |                                      |
| GTTNGTACTGGCCNTTCGNCTGCGCTTGCCCCCAACTCNGGNCGGAGGGACG | MICA*008:02 | MICA*039                |          |                                      |
| GTTNGTACTGGCCNTTCGNNTGCGCTTGCCCNANNNNGGGNCNGAGGGACG  | MICA*008:02 | MICA*040                |          |                                      |
| GTNNGNCTGGCCNTTCGNCTGCGCTTGCCCNANNNNGGGNCNGAGGGACG   | MICA*008:02 | MICA*041                |          |                                      |
| GTTTGACTGGCCNTTCGNCTGCGCTTGCCCCCAACTCGGGTCGGAGGGACG  | MICA*008:02 | MICA*042                |          |                                      |
| GTTNGTACTGGCCNTTCGNCTGCGCTTGCCCNANNNNGGGNCNGAGNGACG  | MICA*008:02 | MICA*043                |          |                                      |
| GTNNGTACTGNCNCTTCGCTTCGCTTGCCCCCAACNCGGGNCNGAGGGACG  | MICA*008:02 | MICA*044                |          |                                      |
| GTTNGTACTGGCCNTTCGNCTGCGCTTGCCCNANNNNGGGNCNGAGGGACG  | MICA*008:02 | MICA*045                |          |                                      |
| GTNNGTACTGGCCNTTCGNCTGCGCTTGCCCNANNNNGGGNCNGAGGGACG  | MICA*008:02 | MICA*046                |          |                                      |
| GTNNGNCTGGCCNTTCGNCTGCGCTTGCCCNANNNNGGGNCNGAGGGANG   | MICA*008:02 | MICA*047                |          |                                      |
| GTNNGTACTGGCCNTTCGNCTGCGCTTGCCCNANNNNGGGNCNGAGGGACG  | MICA*008:02 | MICA*050                |          |                                      |
| GTTTGACTGGCCNTTCGNCTGCGCTTGCCCNANNNNGGGNCNGAGGGACG   | MICA*008:02 | MICA*051                |          |                                      |
| GTNNGTACTGGCCCTTCGCTGCGCTTGCCCCCAACTCGGGNCGGAGGGACG  | MICA*008:02 | MICA*053                |          |                                      |
| NTTTGACTGGCCNTTCGCTGCGCTTGCCCCCAACTCGGGNCGGAGGGACG   | MICA*008:02 | MICA*054                |          |                                      |
| GTTTGACTGGCCNTTCGCTGCGCTTGCCCCCAACTCGGNCGGAGGGACG    | MICA*008:02 | MICA*056                |          |                                      |
| GTTTGACTGGCCNTTCGCTGCGCTTGCCCCCAACTCGGGNCGGAGGGACG   | MICA*008:02 | MICA*057                |          |                                      |
| GTTTGACTGGCCCTTCGCTGCGCTTGCCCCCAACTCGGGNCGGAGGNACG   | MICA*008:02 | MICA*058                |          |                                      |
| GTNNGNCTGGCCNTTCGNCTGCGCTTGCCCNANNNNGGGNCNGAGGGACG   | MICA*008:02 | MICA*059                |          |                                      |
| GTTNNTACTGNCNNTTCGNCTGCGCTTGCCCNANNNNGGGNCNGAGGNACG  | MICA*008:02 | MICA*060                |          |                                      |
| GTTNNTACTGNCNNTTCGNCTGCGCTTGCCCNANNNNGGGNCNAGGGACG   | MICA*008:02 | MICA*061                |          |                                      |
| NTTTGACTGGCCNTTCGCTGCGCTTGCCCCCAACTCGGGNCGGAGGNACG   | MICA*008:02 | MICA*062                |          |                                      |
| GTTTGACTGGCCCTTCGCTGCGCTTGCCCCCAACTCGGGNCGGAGGGACG   | MICA*008:02 | MICA*063N               |          |                                      |
| GTTTGACTGGCCCTTCGCTGCGCTTGCCCCCAACTCGGNCGGAGGGACG    | MICA*008:02 | MICA*064N               |          |                                      |
| NTTTGACTGGCCNTTCGCTGCGCTTGCCCCCAACTCGGGNCGGAGGGACG   | MICA*008:02 | MICA*065                |          |                                      |
| NTTTGACTGGCCNTTCGCTGCGCTTGCCCCCAACTCGGGNCGGAGGGACG   | MICA*008:02 | MICA*066                |          |                                      |
| GTTTGACTGNCNCTTCGCTTCGCTTGCCCCCAACNCGGGNCNGAGGGACG   | MICA*008:02 | MICA*067                |          |                                      |
| GTTTGACTGGCCNTTCGCTTCGCTTGCCNCCAACNCGGGNCNGAGGGACG   | MICA*008:03 | MICA*009:01/MICA*049    |          | Exon 6                               |
| GTTTGACTGGCCNTTCGCTTCNCTTGCCNCCAACNCGGGNCNGAGGGACG   | MICA*008:03 | MICA*009:02             |          |                                      |
| NTTTGACTGGCCNTTCGCTGCGCTTGCCNCCAACTCGGGNCGGAGGGACG   | MICA*008:03 | MICA*010:01/MICA*010:02 |          | Exon 5                               |
| GTNNGTACTGGCCNTTCGNCTGCGCTTGCCCNANNNNGGGNCNGAGGGANG  | MICA*008:03 | MICA*011                |          |                                      |
| GTTNNTACTGNCNNTTCGNCTGCGCTTGCCCNANNNNGGGNCNGAGGGACG  | MICA*008:03 | MICA*012:01             |          |                                      |
| GTTNNTACTGNCNNTTCGNCTGCGCTTGCCCNANNNNGGGNCNGAGGGACG  | MICA*008:03 | MICA*012:02             |          |                                      |
| GTTNNTACTGNCNNTTCGNCTGCGCTTGCCCNANNNNGGGNCNGAGGGACG  | MICA*008:03 | MICA*012:03             |          |                                      |
| GTNNGTACTGGCCCTTCGCTGCGCTTGCCCNANNNNGGGNCGGAGGGACN   | MICA*008:03 | MICA*013                |          | Please see footnote 3                |
| GTNNGTACTGNCCTTCGNCTGNGCTTGCCCNANNNNGGGNCNGAGGGACN   | MICA*008:03 | MICA*014                |          | Please see footnote 3                |
| GTNNGTACTGGCCNTTCGNCTGNGCTTGCCCNANNNNGGGNCNGAGGGACN  | MICA*008:03 | MICA*015                |          |                                      |
| GTTTGACTGGCCNTTCGCTGCGCTTGCCNCCAACTCNGGNCGGAGGGACG   | MICA*008:03 | MICA*016                |          |                                      |
| GTNNGTACTGGCCNTTCGNCTGCGCTTGCCCNANNNNGGGNCNGAGGGACN  | MICA*008:03 | MICA*017                |          |                                      |
| GTTNNTACTGNCNNTTCGNCTGCGCTTGCCCNANNNNGGGNCNGAGGGACG  | MICA*008:03 | MICA*018:01             |          |                                      |
| GTTNNTACTGNCNNTTCGNCTGCGCTTGCCCNANNNNGGGNCNGAGGGACG  | MICA*008:03 | MICA*018:02             |          |                                      |
| GTTTGACTGGCCNTTCGCTGCGCTTGCCNCCAACTCGGGNCGGAGGGACG   | MICA*008:03 | MICA*019                |          |                                      |
| GTNNGTACTGGCCNTTCGCTGCGCTTGCCNCCAACTCGGGNCGGAGGGACG  | MICA*008:03 | MICA*022                |          |                                      |
| GTTTGACTGGCCCTTCGCTGCGCTTGCCNCCAACNCGGGNCNGAGGGACG   | MICA*008:03 | MICA*024                |          |                                      |
| NTTTGACTGGCCNTTCGNCTGCGCTTGCCCNANNNNGGGNCNGAGGGACG   | MICA*008:03 | MICA*025                |          |                                      |
| GTTTGACTGGCCCTTCGCTGCGCTTGCCCNANNNNGGGNCNGAGGGACG    | MICA*008:03 | MICA*028                |          |                                      |
| GTTNGTACTGGCCNTTCGNCTGCGCTTGCCCNANNNNGGGNCNGAGGGACG  | MICA*008:03 | MICA*029                |          |                                      |
| GTNNGTACTGGCCNTTCGNCTGCGCTTGCCCNANNNNGGGNCNGAGGGANG  | MICA*008:03 | MICA*030                |          |                                      |
| GTTTGACTGGCCNTTCGNCTGCGCTTGCCCNANNNNGGGNCNGAGGGACG   | MICA*008:03 | MICA*031                |          |                                      |
| GTTTGACTGNCNNTTCGNCTGCGCTTGCCCNANNNNGGGNCNGAGGGACG   | MICA*008:03 | MICA*032                |          |                                      |
| GTTTGACTGGCCNTTCGCCNCGCTTGCCNCCAACTCGGGNCGGAGGGACG   | MICA*008:03 | MICA*033                |          |                                      |
| GTNNGTACTGGCCNTTCGNCTGCGCTTGCCNCCAACNCGGGNCNGAGGGACG | MICA*008:03 | MICA*034                |          |                                      |













|                                                          |             |             |
|----------------------------------------------------------|-------------|-------------|
| GTNCNTGCTNGCCTNTCGTCTGCGCTTGCCCTTGATCGGGGCCAGANGGANG     | MICA*012:02 | MICA*030    |
| GTTNNTNCTNGCCTNTCGTCTGCGCTTGCCCTTGATCGGGGCCAGANGGACG     | MICA*012:02 | MICA*031    |
| GTTNNTNCTNNCNTATCGTCTGCGCTTGCCCTTGATCGGGGCCAGANGGACG     | MICA*012:02 | MICA*032    |
| GTTNNTNCTNGCANNCTGNCNGCGCTTGCCCNANNANNNGGCCNANGANGGACG   | MICA*012:02 | MICA*033    |
| GTNCNTGCTNGCCTNNCGTCTGCGCTTGCCCNANNANCNGGGCCAGANGGACG    | MICA*012:02 | MICA*034    |
| GTNCNTGCTNGCCTNTCGTCTGCGCTTGCCCNANNANNNGGCCNANGANGGACG   | MICA*012:02 | MICA*035    |
| GTNCNTGCTNGCANNCTGCTGCGNTTGCCCTTGATCGGGGCCAGANGGACG      | MICA*012:02 | MICA*036    |
| GTTCNTGCTNGCCTNTCGTCTGCGCTTGCCCNANNANNNGGCCNANGANGGACG   | MICA*012:02 | MICA*037    |
| GTTCNTGCTNGCCTNTCGTCTGCGCTTGCCCNANNANCNGGGCCAGANGGACG    | MICA*012:02 | MICA*038    |
| GTTCNTGCTNGCCTNTCGTCTGCGCTTGCCCNANNANNNGGCCNANGANGGACG   | MICA*012:02 | MICA*039    |
| GTTCNTGCTNGCCTNTCGTNTGCGCTTGCCCTTGATCGGGGCCAGANGGACG     | MICA*012:02 | MICA*040    |
| GTNCNNGCTNGCCTNTCGTCTGCGCTTGCCCTTGATCGGGGCCAGANGGACG     | MICA*012:02 | MICA*041    |
| GTTNNTNCTNGCCTNTCGTCTGCGCTTGCCCNANNANNNGGCCNANGANGGACG   | MICA*012:02 | MICA*042    |
| GTTCNTGCTNGCCTNTCGTCTGCGCTTGCCCTTGATCGGGGCCAGANNAGC      | MICA*012:02 | MICA*043    |
| GTNCNTNCTNNCNNTCGNCTGCGCTTGCCCNANNANCNGGGCCAGANGGACG     | MICA*012:02 | MICA*044    |
| GTTCNTGCTNGCCTNTCGTCTGCGCTTGCCCTTGATCGGGGCCAGANGGACG     | MICA*012:02 | MICA*045    |
| GTNCNTGCTNGCCTNTCGTCTGCGCTTGCCCTTGATCGGGGCCAGANGGACG     | MICA*012:02 | MICA*046    |
| GTNCNNGCTNGCCTNTCGTCTGCGCTTGCCCTTGATCGGGGCCAGANGGACG     | MICA*012:02 | MICA*047    |
| GTNCNTGCTNGCCTNTCGTCTGCGCTTGCCCTTGATCGGGGCCAGANGGACG     | MICA*012:02 | MICA*050    |
| GTTNNTNCTNGCCTNTCGTCTGCGCTTGCCCTTGATCGGGGCCAGANGGACG     | MICA*012:02 | MICA*051    |
| GTNCNTGCTNGCANNCTGNCCTGCGCTTGCCCNANNANNNGGCCNANGANGGACG  | MICA*012:02 | MICA*053    |
| NTTNTNCTNGCANNCTGNCCTGCGCTTGCCCNANNANNNGGCCNANGANGGACG   | MICA*012:02 | MICA*054    |
| GTTNNTNCTNGCANNCTGNCCTGCGCTTGCCCNANNANNNGGCCNANGANGGACG  | MICA*012:02 | MICA*056    |
| GTTNNTNCTNGCANNCTGNCCTGCGCTTGCCCNANNANNNGGCCAGANGGACG    | MICA*012:02 | MICA*057    |
| GTTNNTNCTNGCANNCTGNCCTGCGCTTGCCCNANNANNNGGCCNANGANGGACG  | MICA*012:02 | MICA*058    |
| GTTNNGCTNGCCTNTCGTCTGCGCTTGCCCTTGATCGGGGCCAGANGGACG      | MICA*012:02 | MICA*059    |
| GTTCATGCTAGCCTATCGTCTGCGCTTGCCCTTGATCGGGGCCAGANGNACG     | MICA*012:02 | MICA*060    |
| GTTCATGCTAGCCTATCGTCTGCGCTTGCCCTTGATCGGGGCCANANGGACG     | MICA*012:02 | MICA*061    |
| NTTNTNCTNGCANNCTGNCCTGCGCTTGCCCNANNANNNGGCCNANGANGGACG   | MICA*012:02 | MICA*062    |
| GTTNNTNCTNGCANNCTGNCCTGCGCTTGCCCNANNANNNGGCCNANGANGGACG  | MICA*012:02 | MICA*063N   |
| GTTNNTNCTNGCANNCTGNCCTGCGCTTGCCCNANNANNNGGCCNANGANGGACG  | MICA*012:02 | MICA*064N   |
| NTTNTNCTNGCANNCTGNCCTGCGCTTGCCCNANNANNNGGCCNANGANGGACG   | MICA*012:02 | MICA*065    |
| NTTNTNCTNGCANNCTGNCCTGCGCTTGCCCNANNANNNGGCCNANGANGGACG   | MICA*012:02 | MICA*066    |
| GTTNNTNCTNNCNNTCGNCTGCGCTTGCCCNANNANCNGGGCCAGANGGACG     | MICA*012:02 | MICA*067    |
| GTNCNTGNCNNGCANNCTGNCCTGCGCTTGCCCTTGATCGGGGCCAGAGGGACN   | MICA*012:03 | MICA*013    |
| GTNCNTGNCNNGCANNCTGCTGNGCTTGCCCTTGATCGGGGCCAGAGGGACN     | MICA*012:03 | MICA*014    |
| GTNCNTGNCNNGCCTNTCGTCTGNGCTTGCCCTTGATCGGGGCCAGAGGGACN    | MICA*012:03 | MICA*015    |
| GTTNNTNCTNNGCANNCTGNCCTGCGCTTGCCCNANNANNNGGCCAGAGGGACG   | MICA*012:03 | MICA*016    |
| GTNCNTGNCNNGCCTNTCGTCTGCGCTTGCCCTTGATCGGGGCCAGAGGGACN    | MICA*012:03 | MICA*017    |
| GTTCATGNCNAGCCTNTCGTCTGCGCTTGCCCTTGATCGGGGCCAGAGGGACG    | MICA*012:03 | MICA*018:01 |
| GTTCATGNCNAGCCTNTCGTCTGCGCTTGCCCTTGATCGGGGCCAGAGGGACG    | MICA*012:03 | MICA*018:02 |
| GTTNNTNCTNNGCANNCTGNCCTGCGCTTGCCCNANNANNNGGCCNANGANGGACG | MICA*012:03 | MICA*019    |
| GTNCNTGNCNNGCANNCTGNCCTGCGCTTGCCCNANNANNNGGCCNANGANGGACG | MICA*012:03 | MICA*022    |
| GTTNNTNCTNNGCANNCTGNCCTGCGCTTGCCCNANNANCNGGGCCAGAGGGACG  | MICA*012:03 | MICA*024    |
| NTTNTNCTNNGCCTNTCGTCTGCGCTTGCCCTTGATCGGGGCCAGAGGGACG     | MICA*012:03 | MICA*025    |
| GTTNNTNCTNNGCANNCTGNCCTGCGCTTGCCCTTGATCGGGGCCAGAGGGACG   | MICA*012:03 | MICA*028    |
| GTTCNTGNCNNGCCTNTGCTGCGCTTGCCCTTGATCGGGGCCAGAGGGACG      | MICA*012:03 | MICA*029    |
| GTNCNTGNCNNGCCTNTCGTCTGCGCTTGCCCTTGATCGGGGCCAGAGGGACG    | MICA*012:03 | MICA*030    |
| GTTNNTNCTNNGCCTNTCGTNTGCGCTTGCCCTTGATCGGGGCCAGAGGGACG    | MICA*012:03 | MICA*031    |
| GTTNNTNCTNNCNNTATCGTCTGCGCTTGCCCTTGATCGGGGCCAGAGGGACG    | MICA*012:03 | MICA*032    |
| GTTNNTNCTNNGCANNCTGNCNNGCGCTTGCCCNANNANNNGGCCNANGANGGACG | MICA*012:03 | MICA*033    |
| GTNCNTGNCNNGCCTNTGCTGCGCTTGCCCNANNANCNGGGCCAGAGGGACG     | MICA*012:03 | MICA*034    |
| GTNCNTGNCNNGCCTNTCGTCTGCGCTTGCCCNANNANNNGGCCNANGANGGACG  | MICA*012:03 | MICA*035    |
| GTNCNTGNCNNGCANNCTGCTGCGNTTGCCCTTGATCGGGGCCAGAGGGACG     | MICA*012:03 | MICA*036    |
| GTTCNTGNCNNGCCTNTCGTCTGCGCTTGCCCNANNANNNGGCCNANGANGGACG  | MICA*012:03 | MICA*037    |
| GTTCNTGNCNNGCCTNTCGTCTGCGCTTGCCCNANNANCNGGGCCAGAGGGACG   | MICA*012:03 | MICA*038    |
| GTTCNTGNCNNGCCTNTCGTCTGCGCTTGCCCNANNANNNGGCCNANGANGGACG  | MICA*012:03 | MICA*039    |
| GTTCNTGNCNNGCCTNTCGTNTGCGCTTGCCCTTGATCGGGGCCAGAGGGACG    | MICA*012:03 | MICA*040    |
| GTNCNNGCANNCTNTCGTCTGCGCTTGCCCTTGATCGGGGCCAGAGGGACG      | MICA*012:03 | MICA*041    |

Please see footnote 3  
Please see footnote 3









|                                                          |          |             |
|----------------------------------------------------------|----------|-------------|
| GTNNGNCTGGCENNTTCGNCTGCGCTTGCCCNANNNNGGCCNAGGGGACG       | MICA*016 | MICA*041    |
| GTTTGACTGGCENNTTCGNCTGCGCTTGCCCCAACTCNGGCGGAGGGACG       | MICA*016 | MICA*042    |
| GTTNGTACTGGCENNTTCGNCTGCGCTTGCCCNANNNNGGCCNAGNGACG       | MICA*016 | MICA*043    |
| GTNNGTACTGNCTCTTCGCTGCGCTTGCCCCAACTCNGGCGGAGGGACG        | MICA*016 | MICA*044    |
| GTTNGTACTGGCENNTTCGNCTGCGCTTGCCCNANNNNGGCCNAGGGGACG      | MICA*016 | MICA*045    |
| GTNNGTACTGGCENNTTCGNCTGCGCTTGCCCNANNNNGGCCNAGGGGACG      | MICA*016 | MICA*046    |
| GTNNGNCTGGCENNTTCGNCTGCGCTTGCCCNANNNNGGCCNAGGGGANG       | MICA*016 | MICA*047    |
| GTTNGTACTGGCENNTTCGNCTGCGCTTGCCCNANNNNGGCCNAGGGGACG      | MICA*016 | MICA*050    |
| GTTTGACTGGCENNTTCGNCTGCGCTTGCCCNANNNNGGCCNAGGGGACG       | MICA*016 | MICA*051    |
| GTNNGTACTGGCENNTTCGCTGCGCTTGCCCCAACTCNGGCGGAGGGACG       | MICA*016 | MICA*053    |
| NTTTGACTGGCTCTTCGCTGCGCTTGCCCCAACTCNGGCGGAGGGNCG         | MICA*016 | MICA*054    |
| GTTTGACTGGCTCTTCGCTGCGCTTGCCCCAACTCNGGCGGAGGGACG         | MICA*016 | MICA*056    |
| GTTTGACTGGCTCTTCGCTGCGCTTGCCCCAACTCNGGCGGAGGGACG         | MICA*016 | MICA*057    |
| GTTTGACTGGCENNTTCGCTGCGCTTGCCCCAACTCNGGCGGAGGNACG        | MICA*016 | MICA*058    |
| GTTNNGTACTGGCENNTTCGNCTGCGCTTGCCCNANNNNGGCCNAGGGGACG     | MICA*016 | MICA*059    |
| GTTNNTACTGNENNTTCGNCTGCGCTTGCCCNANNNNGGCCNAGGNACG        | MICA*016 | MICA*060    |
| GTTNNTACTGNENNTTCGNCTGCGCTTGCCCNANNNNGGCCNAGGGGACG       | MICA*016 | MICA*061    |
| NTTTGACTGGCTCTTCGCTGCGCTTGCCCCAACTCNGGCGGAGGNACG         | MICA*016 | MICA*062    |
| GTTTGACTGNENNTTCGCTGCGCTTGCCCCAACTCNGGCGGAGGGACG         | MICA*016 | MICA*063N   |
| GTTTGACTGGCENNTTCGCTGCGCTTGCCCCAACTCNGGCGGAGGGACG        | MICA*016 | MICA*064N   |
| NTTTGACTGGCTCTTCGCTGCGCTTGCCCCAACTCNGGCGGAGGGACG         | MICA*016 | MICA*065    |
| NTTTGACTGGCTCTTCGCTGCGCTTGCCCCAACTCNGGCGGAGGGACG         | MICA*016 | MICA*066    |
| GTTTGACTGNCTCTTCGCTGCGCTTGCCCCAACTCNGGCGGAGGGACG         | MICA*016 | MICA*067    |
| GTNCTGCTNGCCTTTGCTGCGCTGCGCTTGATCGGGGCCAGAGGGACN         | MICA*017 | MICA*018:01 |
| GTNCTGCTNGCCTTTGCTGCGCTGCGCTTGATCGGGGCCAGAGGGACN         | MICA*017 | MICA*018:02 |
| GTNNGTACTGGCENNTTCGNCTGCGCTTGCCCNANNNNGGCCNAGGGGACN      | MICA*017 | MICA*019    |
| GTGCGTGTGGCENNTTCGNCTGCGCTTGCCCNANNNNGGCCNAGGGGACN       | MICA*017 | MICA*022    |
| GTNNGTACTGGCENNTTCGNCTGCGCTTGCCCNANNNNGGCCNAGGGGACN      | MICA*017 | MICA*024    |
| NTNNGTACTGGCENNTTCGCTGCGCTGCGCTTGATCGGGGCCAGAGGGACN      | MICA*017 | MICA*025    |
| GTNNGTACTGGCENNTTCGNCTGCGCTGCGCTTGATCGGGGCCAGAGGGACN     | MICA*017 | MICA*028    |
| GTNCGTGTGGCCTTTGCTGCGCTGCGCTTGATCGGGGCCAGAGGGACN         | MICA*017 | MICA*029    |
| GTGCGTGTGGCCTTTGCTGCGCTGCGCTTGATCGGGGCCAGAGGGANN         | MICA*017 | MICA*030    |
| GTNNGTACTGGCENNTTCGNTGCGCTGCGCTTGATCGGGGCCAGAGGGACN      | MICA*017 | MICA*031    |
| GTNNGTACTGNENNTTCGCTGCGCTGCGCTTGATCGGGGCCAGAGGGACN       | MICA*017 | MICA*032    |
| GTNNGTACTGGCENNTTCGNCTGCGCTGCGCTTGCCCNANNNNGGCCNAGGGGACN | MICA*017 | MICA*033    |
| GTGCGTGTGGCCTTTGCTGCGCTGCGCTTGCCCNANNNNGGCCNAGGGGACN     | MICA*017 | MICA*034    |
| GTGCGTGTGGCCTTTGCTGCGCTGCGCTTGCCCNANNNNGGCCNAGGGGACN     | MICA*017 | MICA*035    |
| GTGCGTGTGGCENNTTCGCTGCGCTGCGCTTGATCGGGGCCAGAGGGACN       | MICA*017 | MICA*036    |
| GTNCGTGTGGCCTTTGCTGCGCTGCGCTTGCCCNANNNNGGCCNAGGGGACN     | MICA*017 | MICA*037    |
| GTNCGTGTGGCCTTTGCTGCGCTGCGCTTGCCCNANNNNGGCCNAGGGGACN     | MICA*017 | MICA*038    |
| GTNCGTGTGGCCTTTGCTGCGCTGCGCTTGCCCNANNNNGGCCNAGGGGACN     | MICA*017 | MICA*039    |
| GTNCGTGTGGCCTTTGCTGCGCTGCGCTTGATCGGGGCCAGAGGGACN         | MICA*017 | MICA*040    |
| GTGCGNGCTGGCCTTTGCTGCGCTGCGCTTGATCGGGGCCAGAGGGACN        | MICA*017 | MICA*041    |
| GTNNGTACTGGCCTTTGCTGCGCTGCGCTTGCCCNANNNNGGCCNAGGGGACN    | MICA*017 | MICA*042    |
| GTNCGTGTGGCCTNTGCTGCGCTGCGCTTGATCGGGGCCAGAGGNACN         | MICA*017 | MICA*043    |
| GTGCGTACTGNENNTTCGNCTGCGCTGCGCTTGCCCNANNNNGGCCNAGGGGACN  | MICA*017 | MICA*044    |
| GTNCGTGTGGCCTTTGCTGCGCTGCGCTTGATCGGGGCCNAGAGGGACN        | MICA*017 | MICA*045    |
| GTGCGTGTGGCCTTTGCTGCGCTGCGCTTGNTCGGGGCCAGAGGGACN         | MICA*017 | MICA*046    |
| GTGCGNGCTGGCCTTTGCTGCGCTGCGCTTGATCGGGGCCAGAGGGANN        | MICA*017 | MICA*047    |
| GTGCGTGTGGCCTTTGCTGCGCTGCGCTTGATCGGGGCCAGAGGGACN         | MICA*017 | MICA*050    |
| GTNNGTACTGGCCTTTGCTGCGCTGCGCTTGATCGGGGCCAGAGGGACN        | MICA*017 | MICA*051    |
| GTGCGTGTGGCENNTTCGNCTGCGCTGCGCTTGCCCNANNNNGGCCNAGGGGACN  | MICA*017 | MICA*053    |
| NTNNGTACTGGCENNTTCGNCTGCGCTGCGCTTGCCCNANNNNGGCCNAGGGGACN | MICA*017 | MICA*054    |
| GTNNGTACTGGCENNTTCGNCTGCGCTGCGCTTGCCCNANNNNGGCCNAGGGGACN | MICA*017 | MICA*055    |
| GTNNGTACTGGCENNTTCGNCTGCGCTGCGCTTGCCCNANNNNGGCCNAGGGGACN | MICA*017 | MICA*057    |
| GTNNGTACTGGCENNTTCGNCTGCGCTGCGCTTGCCCNANNNNGGCCNAGGNACN  | MICA*017 | MICA*058    |
| GTNCGNGCTGGCCTTTGCTGCGCTGCGCTTGATCGGGGCCNAGAGGGACN       | MICA*017 | MICA*059    |
| GTNCTGCTNGCCTNTGCTGCGCTGCGCTTGATCGGGGCCAGAGGNACN         | MICA*017 | MICA*060    |
| GTNCTGCTNGCCTNTGCTGCGCTGCGCTTGATCGGGGCCANAGGGGACN        | MICA*017 | MICA*061    |







|                                                         |          |           |
|---------------------------------------------------------|----------|-----------|
| GTTTGTACTGGCCNTTCGNCTGCGCTTGCCNCCNANNCNGGGCCAGAGGGACG   | MICA*024 | MICA*051  |
| GTNNGTACTGGCCCTTCGCCTGCGCTTGCCCCAAACNCGGGCCNAGAGGGACG   | MICA*024 | MICA*053  |
| NTTTGTACTGGCNCTTCGCCTGCGCTTGCCCCAAACNCGGGCCNAGAGGGNCG   | MICA*024 | MICA*054  |
| GTTTGTACTGGCNCTTCGCCTGCGCTTGCCCCAAACNCGNGCCNAGAGGGACG   | MICA*024 | MICA*056  |
| GTTTGTACTGGCNCTTCGCCTGCGCTTGCCCCAAACNCGGGCCAGAGGGACG    | MICA*024 | MICA*057  |
| GTTTGTACTGGCCCTTCGCCTGCGCTTGCCCCAAACNCGGGCCNAGAGGNACG   | MICA*024 | MICA*058  |
| GTTNNGNCTGGCCNTTCGNCTGCGCTTGCCNCCNANNCNGGGCCNAGAGGGACG  | MICA*024 | MICA*059  |
| GTTNNTNCTNGCCNNTTCGNCTGCGCTTGCCNCCNANNCNGGGCCAGAGGNACG  | MICA*024 | MICA*060  |
| GTTNNTNCTNGCCNNTTCGNCTGCGCTTGCCNCCNANNCNGGGCCANAGGGACG  | MICA*024 | MICA*061  |
| NTTTGTACTGGCNCTTCGCCTGCGCTTGCCCCAAACNCGGGCCNAGAGGNACG   | MICA*024 | MICA*062  |
| GTTTGTANTGGCCCTTCGCCTGCGCTTGCCCCAAACNCGGGCCNAGAGGGACG   | MICA*024 | MICA*063N |
| GTTTGTACTGGCCCTTCGCCTGCGCTTGCCCCAAACNCGGGCCNAGAGGGACG   | MICA*024 | MICA*064N |
| NTTTGTACTGGCNCTTCGCCTGCGCTTGCCCCAAACNCGGGCCNAGAGGGACG   | MICA*024 | MICA*065  |
| NTTTGTACTGGCNCTTCGCCTGCGCTTGCCCCAAACNCGGGCCNAGAGGGACG   | MICA*024 | MICA*066  |
| GTTTGTACTGNCNCTTCGCCTGCGCTTGCCCCAAACNCGGGCCAGAGGGACG    | MICA*024 | MICA*067  |
| NTTTGTACTGGCCNTTCGNCTGCGCTTGCCCTTGATCGGGGCCAGAGGGACG    | MICA*025 | MICA*028  |
| NTTNNGTACTGGCCCTTCGCTGCGCTTGCCCTTGATCGGGGCCAGAGGGACG    | MICA*025 | MICA*029  |
| NTTNNGTACTGGCCCTTCGCTGCGCTTGCCCTTGATCGGGGCCAGAGGGANG    | MICA*025 | MICA*030  |
| NTTTGTACTGGCCCTTCGCTGCGCTTGCCCTTGATCGGGGCCAGAGGGACG     | MICA*025 | MICA*031  |
| NTTTGTACTGNCNNTTCGCTGCGCTTGCCCTTGATCGGGGCCAGAGGGACG     | MICA*025 | MICA*032  |
| NTTTGTACTGGCNNTTCGNCGCGCTTGCCNCCNANNCNGGGCCNAGAGGGACG   | MICA*025 | MICA*033  |
| NTNNGTACTGGCCCTTCGCTGCGCTTGCCNCCNANNCNGGGCCAGAGGGACG    | MICA*025 | MICA*034  |
| NTNNGTACTGGCCCTTCGCTGCGCTTGCCNCCNANNCNGGGCCNAGAGGGACG   | MICA*025 | MICA*035  |
| NTNNGTACTGGCCNTTCGCTGCGCTTGCCCTTGATCGGGGCCAGAGGGACG     | MICA*025 | MICA*036  |
| NTTNNGTACTGGCCCTTCGCTGCGCTTGCCNCCNANNCNGGGCCNAGAGGGACG  | MICA*025 | MICA*037  |
| NTTNNGTACTGGCCCTTCGCTGCGCTTGCCNCCNANNCNGGGCCAGAGGGACG   | MICA*025 | MICA*038  |
| NTTNNGTACTGGCCCTTCGCTGCGCTTGCCNCCNANNCNGGGCCNAGAGGGACG  | MICA*025 | MICA*039  |
| NTTNNGTACTGGCCCTTCGCTGCGCTTGCCCTTGATCGGGGCCAGAGGGACG    | MICA*025 | MICA*040  |
| NTTNNGNCTGGCCCTTCGCTGCGCTTGCCCTTGATCGGGGCCAGAGGGACG     | MICA*025 | MICA*041  |
| NTTTGTACTGGCCCTTCGCTGCGCTTGCCNCCNANNCNGGGCCNAGAGGGACG   | MICA*025 | MICA*042  |
| NTTNNGTACTGGCCCTTCGCTGCGCTTGCCCTTGATCGGGGCCAGAGGNACG    | MICA*025 | MICA*043  |
| NTNNGTACTGNCNNTTCGNCTGCGCTTGCCNCCNANNCNGGGCCAGAGGGACG   | MICA*025 | MICA*044  |
| NTTNNGTACTGGCCCTTCGCTGCGCTTGCCNCCNANNCNGGGCCNAGAGGGACG  | MICA*025 | MICA*045  |
| NTNNGTACTGGCCCTTCGCTGCGCTTGCCCTTGATCGGGGCCAGAGGGACG     | MICA*025 | MICA*046  |
| NTNNGNCTGGCCCTTCGCTGCGCTTGCCCTTGATCGGGGCCAGAGGGANG      | MICA*025 | MICA*047  |
| NTNNGTACTGGCCCTTCGCTGCGCTTGCCCTTGATCGGGGCCAGAGGGACG     | MICA*025 | MICA*050  |
| NTTTGTACTGGCCCTTCGCTGCGCTTGCCNCTTGATCGGGGCCAGAGGGACG    | MICA*025 | MICA*051  |
| NTNNGTACTGGCCNTTCGNCTGCGCTTGCCNCCNANNCNGGGCCNAGAGGGACG  | MICA*025 | MICA*053  |
| CTTTGTACTGGCNNTTCGNCTGCGCTTGCCNCCNANNCNGGGCCNAGAGGGNCG  | MICA*025 | MICA*054  |
| NTTTGTACTGGCNNTTCGNCTGCGCTTGCCNCCNANNCNGGGCCNAGAGGGACG  | MICA*025 | MICA*056  |
| NTTTGTACTGGCNNTTCGNCTGCGCTTGCCNCCNANNCNGGGCCAGAGGGACG   | MICA*025 | MICA*057  |
| NTTTGTACTGGCCNTTCGNCTGCGCTTGCCNCCNANNCNGGGCCNAGAGGNACG  | MICA*025 | MICA*058  |
| NTTNNGNCTGGCCCTTCGCTGCGCTTGCCNCTTGATCGGGGCCNAGAGGGACG   | MICA*025 | MICA*059  |
| NTTNNTNCTNGCCNTTCGCTGCGCTTGCCCTTGATCGGGGCCAGAGGNACG     | MICA*025 | MICA*060  |
| NTTNNTNCTNGCCNTTCGCTGCGCTTGCCCTTGATCGGGGCCANAGGGACG     | MICA*025 | MICA*061  |
| CTTTGTACTGGCNNTTCGNCTGCGCTTGCCNCCNANNCNGGGCCNAGAGGNACG  | MICA*025 | MICA*062  |
| NTTTGTANTGGCCNTTCGNCTGCGCTTGCCNCCNANNCNGGGCCNAGAGGGACG  | MICA*025 | MICA*063N |
| NTTTGTACTGGCCNTTCGNCTGCGCTTGCCNCCNANNCNGGGCCNAGAGGGACG  | MICA*025 | MICA*064N |
| CTTTGTACTGGCNNTTCGNCTGCGCTTGCCNCCNANNCNGGGCCNAGAGGGACG  | MICA*025 | MICA*065  |
| CTTTGTACTGGCNNTTCGNCTGCGCTTGCCNCCNANNCNGGGCCNAGAGGGACG  | MICA*025 | MICA*066  |
| NTTTGTACTGNCNNTTCGNCTGCGCTTGCCNCCNANNCNGGGCCAGAGGGACG   | MICA*025 | MICA*067  |
| GTTNNGTACTGGCCNTTCGNCTGCGCTTGCCCTTGATCGGGGCCAGAGGGACG   | MICA*028 | MICA*029  |
| GTNNGTACTGGCCNTTCGNCTGCGCTTGCCCTTGATCGGGGCCAGAGGGANG    | MICA*028 | MICA*030  |
| GTTTGTACTGGCCNTTCGNNTGCGCTTGCCCTTGATCGGGGCCAGAGGGACG    | MICA*028 | MICA*031  |
| GTTTGTACTGNCNNTTCGNCTGCGCTTGCCCTTGATCGGGGCCAGAGGGACG    | MICA*028 | MICA*032  |
| GTTTGTACTGGCNCTTCGCNCGCGCTTGCCNCCNANNCNGGGCCNAGAGGGACG  | MICA*028 | MICA*033  |
| GTNNGTACTGGCCNTTCGNCTGCGCTTGCCNCCNANNCNGGGCCAGAGGGACG   | MICA*028 | MICA*034  |
| GTNNGTACTGGCCNTTCGNCTGCGCTTGCCCTTGATCGGGGCCAGAGGGACG    | MICA*028 | MICA*036  |
| GTTNNGTACTGGCCNTTCGNCTGCGCTTGCCNCCNANNCNGGGCCNAGAGGGACG | MICA*028 | MICA*039  |

|                                                        |          |           |
|--------------------------------------------------------|----------|-----------|
| GTNNGTACTGGCCNTTCGNNTGCGCTTGCCCTTGATCGGGGCCAGAGGGACG   | MICA*028 | MICA*040  |
| GTNNGTACTGGCCNTTCGNCTGCGCTTGCCCTTGATCGGGGCCAGAGGGACG   | MICA*028 | MICA*041  |
| GTTTGTACTGGCCNTTCGNCTGCGCTTGCCCNANNNNGGNCNAGAGGGACG    | MICA*028 | MICA*042  |
| GTNNGTACTGGCCNTTCGNCTGCGCTTGCCCTTGATCGGGGCCAGAGNGACG   | MICA*028 | MICA*043  |
| GTNNGTACTGNCNCTTCGCTTCGCTTGCCCNANNCNGGGCCAGAGGGACG     | MICA*028 | MICA*044  |
| GTNNGTACTGGCCNTTCGNCTGCGCTTGCCCTTGATCGGGGCCNAGAGGGACG  | MICA*028 | MICA*045  |
| GTNNGTACTGGCCNTTCGNCTGCGCTTGCCCTTGATCGGGGCCAGAGGGACG   | MICA*028 | MICA*046  |
| GTNNGTACTGGCCNTTCGNCTGCGCTTGCCCTTGATCGGGGCCAGAGGGANG   | MICA*028 | MICA*047  |
| GTNNGTACTGGCCNTTCGNCTGCGCTTGCCCTTGATCGGGGCCAGAGGGACG   | MICA*028 | MICA*050  |
| GTTTGTACTGGCCNTTCGNCTGCGCTTGCCCTTGATCGGGGCCAGAGGGACG   | MICA*028 | MICA*051  |
| GTNNGTACTGGCCCTTCGCTTCGCTTGCCCNANNNNGGNCNAGAGGGACG     | MICA*028 | MICA*053  |
| NTTGTACTGGCNCTTCGCTTCGCTTGCCCNANNNNGGNCNAGAGGGACG      | MICA*028 | MICA*054  |
| GTTTGTACTGGCNCTTCGCTTCGCTTGCCCNANNNNGGNCNAGAGGGACG     | MICA*028 | MICA*056  |
| GTTTGTACTGGCNCTTCGCTTCGCTTGCCCNANNNNGGNCNAGAGGGACG     | MICA*028 | MICA*057  |
| GTTTGTACTGGCCCTTCGCTTCGCTTGCCCNANNNNGGNCNAGAGGNACG     | MICA*028 | MICA*058  |
| GTTNNGTACTGGCCNTTCGNCTGCGCTTGCCCTTGATCGGGGCCNAGAGGGACG | MICA*028 | MICA*059  |
| GTTNNTNCTNGCCNNTTCGNCTGCGCTTGCCCTTGATCGGGGCCAGAGGNACG  | MICA*028 | MICA*060  |
| GTTNNTNCTNGCCNNTTCGNCTGCGCTTGCCCTTGATCGGGGCCANAGGGACG  | MICA*028 | MICA*061  |
| NTTGTACTGGCNCTTCGCTTCGCTTGCCCNANNNNGGNCNAGAGGNACG      | MICA*028 | MICA*062  |
| GTTTGTANTGGCCCTTCGCTTCGCTTGCCCNANNNNGGNCNAGAGGGACG     | MICA*028 | MICA*063N |
| GTTTGTACTGGCCCTTCGCTTCGCTTGCCCNANNNNGGNCNAGAGGGACG     | MICA*028 | MICA*064N |
| NTTGTACTGGCNCTTCGCTTCGCTTGCCCNANNNNGGNCNAGAGGGACG      | MICA*028 | MICA*065  |
| NTTGTACTGGCNCTTCGCTTCGCTTGCCCNANNNNGGNCNAGAGGGACG      | MICA*028 | MICA*066  |
| GTTTGTACTGNCNCTTCGCTTCGCTTGCCCNANNCNGGGCCAGAGGGACG     | MICA*028 | MICA*067  |
| GTNCGTGCTGGCCCTTNGTCTGCGCTTGCCCTTGATCGGGGCCAGAGGGANG   | MICA*029 | MICA*030  |
| GTNNGTACTGGCCCTTNGTNTGCGCTTGCCCTTGATCGGGGCCAGAGGGACG   | MICA*029 | MICA*031  |
| GTTNNGTACTGNCNNTNGTCTGCGCTTGCCCTTGATCGGGGCCAGAGGGACG   | MICA*029 | MICA*032  |
| GTNNGTACTGGCNNTNGNCGCGCTTGCCCNANNNNGGNCNAGAGGGACG      | MICA*029 | MICA*033  |
| GTNCGTGCTGGCCCTTNGTCTGCGCTTGCCCNANNCNGGGCCAGAGGGACG    | MICA*029 | MICA*034  |
| GTNCGTGCTGGCCCTTNGTCTGCGCTTGCCCNANNNNGGNCNAGAGGGACG    | MICA*029 | MICA*035  |
| GTNCGTGCTGGCNNTNGTCTGCGNTTGCCCTTGATCGGGGCCAGAGGGACG    | MICA*029 | MICA*036  |
| GTTCTGTGCTGGCCCTTNGTCTGCGCTTGCCCNANNNNGGNCNAGAGGGACG   | MICA*029 | MICA*037  |
| GTTCTGTGCTGGCCCTTNGTCTGCGCTTGCCCNANNCNGGGCCAGAGGGACG   | MICA*029 | MICA*038  |
| GTTCTGTGCTGGCCCTTNGTCTGCGCTTGCCCNANNNNGGNCNAGAGGGACG   | MICA*029 | MICA*039  |
| GTTCTGTGCTGGCCCTTNGTNTGCGCTTGCCCTTGATCGGGGCCAGAGGGACG  | MICA*029 | MICA*040  |
| GTNCGNGCTGGCCCTTNGTCTGCGCTTGCCCTTGATCGGGGCCAGAGGGACG   | MICA*029 | MICA*041  |
| GTTNNGTACTGGCCCTTNGTCTGCGCTTGCCCNANNNNGGNCNAGAGGGACG   | MICA*029 | MICA*042  |
| GTTCTGTGCTGNCNNTNGNCTGCGCTTGCCCNANNCNGGGCCAGAGGGACG    | MICA*029 | MICA*043  |
| GTNCGTACTGGCCCTTNGTCTGCGCTTGCCCTTGATCGGGGCCAGAGGGACG   | MICA*029 | MICA*044  |
| GTTCTGTGCTGGCCCTTNGTCTGCGCTTGCCCTTGATCGGGGCCNAGAGGGACG | MICA*029 | MICA*045  |
| GTNCGTGCTGGCCCTTNGTCTGCGCTTGCCCTTGATCGGGGCCAGAGGGACG   | MICA*029 | MICA*046  |
| GTNCGNGCTGGCCCTTNGTCTGCGCTTGCCCTTGATCGGGGCCAGAGGGANG   | MICA*029 | MICA*047  |
| GTNCGTGCTGGCCCTTNGTCTGCGCTTGCCCTTGATCGGGGCCAGAGGGACG   | MICA*029 | MICA*050  |
| GTTNNGTACTGGCCCTTNGTCTGCGCTTGCCCTTGATCGGGGCCAGAGGGACG  | MICA*029 | MICA*051  |
| GTNCGTGCTGGCCNTNGNCTGCGCTTGCCCNANNNNGGNCNAGAGGGACG     | MICA*029 | MICA*053  |
| NTTNGTACTGGCNNTNGNCTGCGCTTGCCCNANNNNGGNCNAGAGGGACG     | MICA*029 | MICA*054  |
| GTTNNGTACTGGCNNTNGNCTGCGCTTGCCCNANNNNGGNCNAGAGGGACG    | MICA*029 | MICA*056  |
| GTTNNGTACTGGCNNTNGNCTGCGCTTGCCCNANNNNGGNCNAGAGGGACG    | MICA*029 | MICA*057  |
| GTTNNGTACTGGCNNTNGNCTGCGCTTGCCCNANNNNGGNCNAGAGGNACG    | MICA*029 | MICA*058  |
| GTTNNGTACTGGCCCTTNGTCTGCGCTTGCCCTTGATCGGGGCCNAGAGGGACG | MICA*029 | MICA*059  |
| GTTNNTGCTNGCCNTNGTCTGCGCTTGCCCTTGATCGGGGCCAGAGGNACG    | MICA*029 | MICA*060  |
| GTTNNTGCTNGCCNTNGTCTGCGCTTGCCCTTGATCGGGGCCANAGGGACG    | MICA*029 | MICA*061  |
| NTTNGTACTGGCNNTNGNCTGCGCTTGCCCNANNNNGGNCNAGAGGNACG     | MICA*029 | MICA*062  |
| GTTNNTGCTGGCCNTNGNCTGCGCTTGCCCNANNNNGGNCNAGAGGGACG     | MICA*029 | MICA*063N |
| GTTNNTGCTGGCCNTNGNCTGCGCTTGCCCNANNNNGGNCNAGAGGGACG     | MICA*029 | MICA*064N |
| NTTNGTACTGGCNNTNGNCTGCGCTTGCCCNANNNNGGNCNAGAGGGACG     | MICA*029 | MICA*065  |
| NTTNGTACTGGCNNTNGNCTGCGCTTGCCCNANNNNGGNCNAGAGGGACG     | MICA*029 | MICA*066  |
| GTTNNGTACTGNCNNTNGNCTGCGCTTGCCCNANNCNGGGCCAGAGGGACG    | MICA*029 | MICA*067  |
| GTNNGTACTGGCCCTTCGNTGCGCTTGCCCTTGATCGGGGCCAGAGGGANG    | MICA*030 | MICA*031  |

|                                                         |          |           |  |  |
|---------------------------------------------------------|----------|-----------|--|--|
| GTNNGTNCNTGNCNNTGCTGCTGCGCTTGCCCTTGATCGGGGCCAGAGGGANG   | MICA*030 | MICA*032  |  |  |
| GTNNGTNCNTGNCNNTGCGNCTGCGCTTGCCCNANNANNNGGGCCNAGAGGGANG | MICA*030 | MICA*033  |  |  |
| GTGCGTGCTGGCCTTTCGTCTGCGCTTGCCCNANNANCGGGCCAGAGGGANG    | MICA*030 | MICA*034  |  |  |
| GTGCGTGCTGGCCTTTCGTCTGCGCTTGCCCNANNANNNGGGCCNAGAGGGANG  | MICA*030 | MICA*035  |  |  |
| GTGCGTGCTGGCCTTTCGTCTGCGCTTGCCCTTGATCGGGGCCAGAGGGANG    | MICA*030 | MICA*036  |  |  |
| GTNCGTGCTGGCCTTTCGTCTGCGCTTGCCCNANNANNNGGGCCNAGAGGGANG  | MICA*030 | MICA*037  |  |  |
| GTNCGTGCTGGCCTTTCGTCTGCGCTTGCCCNANNANCGGGCCAGAGGGANG    | MICA*030 | MICA*038  |  |  |
| GTNCGTGCTGGCCTTTCGTCTGCGCTTGCCCNANNANNNGGGCCNAGAGGGANG  | MICA*030 | MICA*039  |  |  |
| GTNCGTGCTGGCCTTTCGTNTGCGCTTGCCCTTGATCGGGGCCAGAGGGANG    | MICA*030 | MICA*040  |  |  |
| GTNNGTNCNTGCGCTTTCGTCTGCGCTTGCCCNANNANNNGGGCCNAGAGGGANG | MICA*030 | MICA*042  |  |  |
| GTNCGTGCTGGCCTTTCGTCTGCGCTTGCCCTTGATCGGGGCCAGAGNGANG    | MICA*030 | MICA*043  |  |  |
| GTGCGTNCNTGNCNNTGCGCTTGCCCNANNANCGGGCCAGAGGGANG         | MICA*030 | MICA*044  |  |  |
| GTNCGTGCTGGCCTTTCGTCTGCGCTTGCCCTTGATCGGGGCCNAGAGGGANG   | MICA*030 | MICA*045  |  |  |
| GTGCGTGCTGGCCTTTCGTCTGCGCTTGCCCTTGNTCGGGGCCAGAGGGANG    | MICA*030 | MICA*046  |  |  |
| GTGCGNGCTGGCCTTTCGTCTGCGCTTGCCCTTGATCGGGGCCAGAGGGAGG    | MICA*030 | MICA*047  |  |  |
| GTGCGTGCTGGCCTTTCGTCTGCGCTTGCCCTTGATCGGGGCCAGAGGGANG    | MICA*030 | MICA*050  |  |  |
| GTNNGTNCNTGCGCTTTCGTCTGCGCTTGCCCTTGATCGGGGCCAGAGGGANG   | MICA*030 | MICA*051  |  |  |
| GTGCGTGCTGGCCNTTCGNCTGCGCTTGCCCNANNANNNGGGCCNAGAGGGANG  | MICA*030 | MICA*053  |  |  |
| NTNNGTNCNTGCGCTTTCGNCTGCGCTTGCCCNANNANNNGGGCCNAGAGGGANG | MICA*030 | MICA*054  |  |  |
| GTNNGTNCNTGCGCTTTCGNCTGCGCTTGCCCNANNANNNGGGCCNAGAGGGANG | MICA*030 | MICA*056  |  |  |
| GTNNGTNCNTGCGCTTTCGNCTGCGCTTGCCCNANNANNNGGGCCNAGAGGGANG | MICA*030 | MICA*057  |  |  |
| GTNNGTNCNTGCGCTTTCGNCTGCGCTTGCCCNANNANNNGGGCCNAGAGGNANG | MICA*030 | MICA*058  |  |  |
| GTNCGNGCTGGCCTTTCGTCTGCGCTTGCCCTTGATCGGGGCCNAGAGGGANG   | MICA*030 | MICA*059  |  |  |
| GTNCGTNCNTGCGCTTTCGTCTGCGCTTGCCCTTGATCGGGGCCAGAGGNANG   | MICA*030 | MICA*060  |  |  |
| GTNCGTNCNTGCGCTTTCGTCTGCGCTTGCCCTTGATCGGGGCCANAGGGANG   | MICA*030 | MICA*061  |  |  |
| NTNNGTNCNTGCGCTTTCGNCTGCGCTTGCCCNANNANNNGGGCCNAGAGGNANG | MICA*030 | MICA*062  |  |  |
| GTNNGTNCNTGCGCTTTCGNCTGCGCTTGCCCNANNANNNGGGCCNAGAGGGANG | MICA*030 | MICA*063N |  |  |
| GTNNGTNCNTGCGCTTTCGNCTGCGCTTGCCCNANNANNNGGGCCNAGAGGGANG | MICA*030 | MICA*064N |  |  |
| NTNNGTNCNTGCGCTTTCGNCTGCGCTTGCCCNANNANNNGGGCCNAGAGGGANG | MICA*030 | MICA*065  |  |  |
| NTNNGTNCNTGCGCTTTCGNCTGCGCTTGCCCNANNANNNGGGCCNAGAGGGANG | MICA*030 | MICA*066  |  |  |
| GTNNGTNCNTGNCNNTTCGNCTGCGCTTGCCCNANNANCGGGCCAGAGGGANG   | MICA*030 | MICA*067  |  |  |
| GTTTGTACTGNCNNTTCGNTGCGCTTGCCCTTGATCGGGGCCAGAGGGACG     | MICA*031 | MICA*032  |  |  |
| GTTTGTACTGGCCTTTCGNNTGCGCTTGCCCNANNANNNGGGCCNAGAGGGACG  | MICA*031 | MICA*033  |  |  |
| GTNNGTNCNTGCGCTTTCGNCTGCGCTTGCCCNANNANCGGGCCAGAGGGACG   | MICA*031 | MICA*034  |  |  |
| GTNNGTNCNTGCGCTTTCGNCTGCGCTTGCCCNANNANNNGGGCCNAGAGGGACG | MICA*031 | MICA*035  |  |  |
| GTNNGTNCNTGCGCTTTCGNCTGCGCTTGCCCTTGATCGGGGCCAGAGGGACG   | MICA*031 | MICA*036  |  |  |
| GTNNGTNCNTGCGCTTTCGNCTGCGCTTGCCCNANNANNNGGGCCNAGAGGGACG | MICA*031 | MICA*037  |  |  |
| GTTTGTACTGGCCTTTCGNCTGCGCTTGCCCNANNANCGGGCCAGAGGGACG    | MICA*031 | MICA*038  |  |  |
| GTTTGTACTGGCCTTTCGNCTGCGCTTGCCCNANNANNNGGGCCNAGAGGGACG  | MICA*031 | MICA*039  |  |  |
| GTTTGTACTGGCCTTTCGNCTGCGCTTGCCCTTGATCGGGGCCAGAGGGACG    | MICA*031 | MICA*040  |  |  |
| GTNNGNNTGCGCTTTCGNCTGCGCTTGCCCTTGATCGGGGCCAGAGGGACG     | MICA*031 | MICA*041  |  |  |
| GTTTGTACTGGCCTTTCGNCTGCGCTTGCCCNANNANNNGGGCCNAGAGGGACG  | MICA*031 | MICA*042  |  |  |
| GTTTGTACTGGCCTTTCGNCTGCGCTTGCCCTTGATCGGGGCCAGAGGNACG    | MICA*031 | MICA*043  |  |  |
| GTNNGTACTGNCNNTTCGNNTGCGCTTGCCCNANNANCGGGCCAGAGGGACG    | MICA*031 | MICA*044  |  |  |
| GTTTGTACTGGCCTTTCGNCTGCGCTTGCCCTTGATCGGGGCCNAGAGGGACG   | MICA*031 | MICA*045  |  |  |
| GTNNGTNCNTGCGCTTTCGNCTGCGCTTGCCCTTGNTCGGGGCCAGAGGGACG   | MICA*031 | MICA*046  |  |  |
| GTNNGNNTGCGCTTTCGNCTGCGCTTGCCCTTGATCGGGGCCAGAGGGANG     | MICA*031 | MICA*047  |  |  |
| GTNNGTNCNTGCGCTTTCGNCTGCGCTTGCCCTTGATCGGGGCCAGAGGGACG   | MICA*031 | MICA*050  |  |  |
| GTTTGTACTGGCCTTTCGNCTGCGCTTGCCCTTGATCGGGGCCAGAGGGACG    | MICA*031 | MICA*051  |  |  |
| GTNNGTNCNTGCGCTTTCGNCTGCGCTTGCCCNANNANNNGGGCCNAGAGGGACG | MICA*031 | MICA*053  |  |  |
| NTTGTACTGGCCTTTCGNNTGCGCTTGCCCNANNANNNGGGCCNAGAGGNCG    | MICA*031 | MICA*054  |  |  |
| GTTTGTACTGGCCTTTCGNNTGCGCTTGCCCNANNANNNGGGCCNAGAGGGACG  | MICA*031 | MICA*056  |  |  |
| GTTTGTACTGGCCTTTCGNNTGCGCTTGCCCNANNANNNGGGCCAGAGGGACG   | MICA*031 | MICA*057  |  |  |
| GTTTGTACTGGCCTTTCGNNTGCGCTTGCCCNANNANNNGGGCCNAGAGGNACG  | MICA*031 | MICA*058  |  |  |
| GTTTGTACTGGCCTTTCGNNTGCGCTTGCCCTTGATCGGGGCCAGAGGGACG    | MICA*031 | MICA*059  |  |  |
| GTTTGTACTGGCCTTTCGNNTGCGCTTGCCCTTGATCGGGGCCAGAGGNACG    | MICA*031 | MICA*060  |  |  |
| GTTTGTACTGGCCTTTCGNNTGCGCTTGCCCTTGATCGGGGCCANAGGGACG    | MICA*031 | MICA*061  |  |  |
| NTTGTACTGGCCTTTCGNNTGCGCTTGCCCNANNANNNGGGCCNAGAGGNACG   | MICA*031 | MICA*062  |  |  |
| GTTTGTACTGGCCTTTCGNNTGCGCTTGCCCNANNANNNGGGCCNAGAGGGACG  | MICA*031 | MICA*063N |  |  |

MICA\*045      MICA\*047      Insufficient data available





|                                                        |          |           |
|--------------------------------------------------------|----------|-----------|
| NTTTGACTGGCTCTTCGCCNGCGCTTGCCCCAACTCGGGCCGGAGGNACG     | MICA*033 | MICA*062  |
| GTTTGACTGGCNCCTTCGCCNGCGCTTGCCCCAACTCGGGCCGGAGGGACG    | MICA*033 | MICA*063N |
| GTTTGACTGGCNCCTTCGCCNGCGCTTGCCCCAACTCGGNCCGGAGGGACG    | MICA*033 | MICA*064N |
| NTTTGACTGGCTCTTCGCCNGCGCTTGCCCCAACTCGGGCCGGAGGGACG     | MICA*033 | MICA*065  |
| NTTTGACTGGCTCTTCGCCNGCGCTTGCCCCAACTCGGGCCGGNGGGACG     | MICA*033 | MICA*066  |
| GTTTGACTGNCTCTTCGCCNNGCNCNTGCCCAACNCGGGCCNGAGGGACG     | MICA*033 | MICA*067  |
| GTGCGTGCTGGCCTTNCGTCTGCGCTTGCCCCAAACNCGGGCCNGAGGGACG   | MICA*034 | MICA*035  |
| GTGCGTGCTGGCCTTNCGTCTGCGNTTGCCCNNNANNCNGGGCCAGAGGGACG  | MICA*034 | MICA*036  |
| GTNCGTGCTGGCCTTNCGTCTGCGCTTGCCCCAAACNCGGGCCNGAGGGACG   | MICA*034 | MICA*037  |
| GTNCGTGCTGGCCTTNCGTCTGCGCTTGCCCCAAACNCGGGCCAGAGGGACG   | MICA*034 | MICA*038  |
| GTNCGTGCTGGCCTTNCGTCTGCGCTTGCCCCAAACNCGGGCCNGAGGGACG   | MICA*034 | MICA*039  |
| GTNCGTGCTGGCCTTNCGTCTGCGCTTGCCCNNNANNCNGGGCCAGAGGGACG  | MICA*034 | MICA*040  |
| GTGCGNGCTGGCCTTNCGTCTGCGCTTGCCCNNNANNCNGGGCCAGAGGGACG  | MICA*034 | MICA*041  |
| GTNNGTNCCTGGCCTTNCGTCTGCGCTTGCCCCAAACNCGGGCCNGAGGGACG  | MICA*034 | MICA*042  |
| GTNCGTGCTGGCCTTNCGTCTGCGCTTGCCCNNNANNCNGGGCCAGAGNGACG  | MICA*034 | MICA*043  |
| GTGCGTNCGTGNCNNTGNCNCTGCGCTTGCCCCAAACNCGGGCCAGAGGGACG  | MICA*034 | MICA*044  |
| GTNCGTGCTGGCCTTNCGTCTGCGCTTGCCCNNNANNCNGGGCCAGAGGGACG  | MICA*034 | MICA*045  |
| GTGCGNGCTGGCCTTNCGTCTGCGCTTGCCCNNNANNCNGGGCCAGAGGGACG  | MICA*034 | MICA*046  |
| GTGCGNGCTGGCCTTNCGTCTGCGCTTGCCCNNNANNCNGGGCCAGAGGGACG  | MICA*034 | MICA*047  |
| GTGCGTGCTGGCCTTNCGTCTGCGCTTGCCCNNNANNCNGGGCCAGAGGGACG  | MICA*034 | MICA*050  |
| GTNNGTNCCTGGCCTTNCGTCTGCGCTTGCCCNNNANNCNGGGCCAGAGGGACG | MICA*034 | MICA*051  |
| GTGCGTGCTGGCCTTNCGTCTGCGCTTGCCCCAAACNCGGGCCNGAGGGACG   | MICA*034 | MICA*053  |
| NTNNGTNCCTGGCCTTNCGTCTGCGCTTGCCCCAAACNCGGGCCNGAGGGACG  | MICA*034 | MICA*054  |
| GTNNGTNCCTGGCCTTNCGTCTGCGCTTGCCCCAAACNCGGGCCNGAGGGACG  | MICA*034 | MICA*056  |
| GTNNGTNCCTGGCCTTNCGTCTGCGCTTGCCCCAAACNCGGGCCAGAGGGACG  | MICA*034 | MICA*057  |
| GTNNGTNCCTGGCCTTNCGTCTGCGCTTGCCCCAAACNCGGGCCNGAGGNACG  | MICA*034 | MICA*058  |
| GTNCGNGCTGGCCTTNCGTCTGCGCTTGCCCNNNANNCNGGGCCAGAGGGACG  | MICA*034 | MICA*059  |
| GTNCGTGCTGGCCTTNCGTCTGCGCTTGCCCNNNANNCNGGGCCAGAGGNACG  | MICA*034 | MICA*060  |
| GTNCGTGCTGGCCTTNCGTCTGCGCTTGCCCNNNANNCNGGGCCAGAGGGACG  | MICA*034 | MICA*061  |
| NTNNGTNCCTGGCCTTNCGTCTGCGCTTGCCCCAAACNCGGGCCNGAGGNACG  | MICA*034 | MICA*062  |
| GTNNGTNCCTGGCCTTNCGTCTGCGCTTGCCCCAAACNCGGGCCNGAGGGACG  | MICA*034 | MICA*063N |
| GTNNGTNCCTGGCCTTNCGTCTGCGCTTGCCCCAAACNCGGGCCNGAGGGACG  | MICA*034 | MICA*064N |
| NTNNGTNCCTGGCCTTNCGTCTGCGCTTGCCCCAAACNCGGGCCNGAGGGACG  | MICA*034 | MICA*065  |
| NTNNGTNCCTGGCCTTNCGTCTGCGCTTGCCCCAAACNCGGGCCNGGGGACG   | MICA*034 | MICA*066  |
| GTNNGTNCCTGNCNNTGNCNCTGCGCTTGCCCCAAACNCGGGCCAGAGGGACG  | MICA*034 | MICA*067  |
| GTGCGTGCTGGCCTTTCGTCTGCGCTTGCCCNNNANNCNGGGCCAGAGGGACG  | MICA*035 | MICA*036  |
| GTNCGTGCTGGCCTTTCGTCTGCGCTTGCCCCAACTCGGGCCGGAGGGACG    | MICA*035 | MICA*037  |
| GTNCGTGCTGGCCTTTCGTCTGCGCTTGCCCCAAACNCGGGCCNGAGGGACG   | MICA*035 | MICA*038  |
| GTNCGTGCTGGCCTTTCGTCTGCGCTTGCCCCAACTCGGGCCGGAGGGACG    | MICA*035 | MICA*039  |
| GTNCGTGCTGGCCTTTCGTCTGCGCTTGCCCNNNANNCNGGGCCNGAGGGACG  | MICA*035 | MICA*040  |
| GTGCGNGCTGGCCTTTCGTCTGCGCTTGCCCNNNANNCNGGGCCNGAGGGACG  | MICA*035 | MICA*041  |
| GTNNGTNCCTGGCCTTTCGTCTGCGCTTGCCCCAACTCGGGCCGGAGGGACG   | MICA*035 | MICA*042  |
| GTNCGTGCTGGCCTTTCGTCTGCGCTTGCCCNNNANNCNGGGCCNGAGNGACG  | MICA*035 | MICA*043  |
| GTGCGTNCGTGNCNNTTGCNCTGCGCTTGCCCCAAACNCGGGCCNGAGGGACG  | MICA*035 | MICA*044  |
| GTNCGTGCTGGCCTTTCGTCTGCGCTTGCCCNNNANNCNGGGCCNGAGGGACG  | MICA*035 | MICA*045  |
| GTGCGTGCTGGCCTTTCGTCTGCGCTTGCCCNNNANNCNGGGCCNGAGGGACG  | MICA*035 | MICA*046  |
| GTGCGNGCTGGCCTTTCGTCTGCGCTTGCCCNNNANNCNGGGCCNGAGGGACG  | MICA*035 | MICA*047  |
| GTGCGTGCTGGCCTTTCGTCTGCGCTTNCNNANNCNGGGCCNGAGGGACG     | MICA*035 | MICA*050  |
| GTNNGTNCCTGGCCTTTCGTCTGCGCTTGCCCNNNANNCNGGGCCNGAGGGACG | MICA*035 | MICA*051  |
| GTGCGTGCTGGCCTTTCGTCTGCGCTTGCCCCAACTCGGGCCGGAGGGACG    | MICA*035 | MICA*053  |
| NTNNGTNCCTGGCCTTTCGTCTGCGCTTGCCCCAACTCGGGCCGGAGGNCG    | MICA*035 | MICA*054  |
| GTNNGTNCCTGGCCTTTCGTCTGCGCTTGCCCCAACTCGNGCCGGAGGGACG   | MICA*035 | MICA*056  |
| GTNNGTNCCTGGCCTTTCGTCTGCGCTTGCCCCAACTCGGGCCNGAGGGACG   | MICA*035 | MICA*057  |
| GTNNGTNCCTGGCCTTTCGTCTGCGCTTGCCCCAACTCGGGCCGGAGGNACG   | MICA*035 | MICA*058  |
| GTNCGNGCTGGCCTTTCGTCTGCGCTTGCCCNNNANNCNGGGCCNGAGGGACG  | MICA*035 | MICA*059  |
| GTNCGTGCTGGCCTTTCGTCTGCGCTTGCCCNNNANNCNGGGCCNGAGGNACG  | MICA*035 | MICA*060  |
| GTNCGTGCTGGCCTTTCGTCTGCGCTTGCCCNNNANNCNGGGCCNGAGGGACG  | MICA*035 | MICA*061  |
| NTNNGTNCCTGGCCTTTCGTCTGCGCTTGCCCCAACTCGGGCCGGAGGNACG   | MICA*035 | MICA*062  |
| GTNNGTNCCTGGCCTTTCGTCTGCGCTTGCCCCAACTCGGGCCGGAGGGACG   | MICA*035 | MICA*063N |

|                                                        |          |           |
|--------------------------------------------------------|----------|-----------|
| GTNNGTNCCTGGCCNNTTCGNCTGCGCTTGCCCCAACTCGGNCGGAGGGACG   | MICA*035 | MICA*064N |
| NTNNGTNCCTGGCCNNTTCGNCTGCGCTTGCCCCAACTCGGGCCGAGGGACG   | MICA*035 | MICA*065  |
| NTNNGTNCCTGGCCNNTTCGNCTGCGCTTGCCCCAACTCGGGCCGNGGGACG   | MICA*035 | MICA*066  |
| GTNNGTNCCTGGCCNNTTCGNCTGCGCTTGCCCCAACTCGGGCCGAGGGACG   | MICA*035 | MICA*067  |
| GTNCGTGCTGGCCNNTTCGTCTGCGNTTGCCCNANNNNGGCCNAGAGGGACG   | MICA*036 | MICA*037  |
| GTNCGTGCTGGCCNNTTCGTCTGCGNTTGCCCNANNNNGGCCAGAGGGACG    | MICA*036 | MICA*038  |
| GTNCGTGCTGGCCNNTTCGTCTGCGNTTGCCCNANNNNGGCCNAGAGGGACG   | MICA*036 | MICA*039  |
| GTNCGTGCTGGCCNNTTCGTNTGCGNTTGCCCTTGATCGGGCCAGAGGGACG   | MICA*036 | MICA*040  |
| GTGCGNGCTGGCCNNTTCGTCTGCGNTTGCCCTTGATCGGGCCAGAGGGACG   | MICA*036 | MICA*041  |
| GTNNGTNCCTGGCCNNTTCGTCTGCGNTTGCCCNANNNNGGCCNAGAGGGACG  | MICA*036 | MICA*042  |
| GTNCGTGCTGGCCNNTTCGTCTGCGNTTGCCCTTGATCGGGCCAGAGNGACG   | MICA*036 | MICA*043  |
| GTGCGTNCCTGCTCTGCTGCGNTTGCCCNANNNNGGCCAGAGGGACG        | MICA*036 | MICA*044  |
| GTNCGTGCTGGCCNNTTCGTCTGCGNTTGCTGATCGGGCCNAGAGGGACG     | MICA*036 | MICA*045  |
| GTGCGTGCTGGCCNNTTCGTCTGCGNTTGCCCTTGATCGGGCCAGAGGGACG   | MICA*036 | MICA*046  |
| GTGCGNGCTGGCCNNTTCGTCTGCGNTTGCCCTTGATCGGGCCAGAGGGACG   | MICA*036 | MICA*047  |
| GTGCGTGCTGGCCNNTTCGTCTGCGNTTGCCCTTGATCGGGCCAGAGGGACG   | MICA*036 | MICA*050  |
| GTNNGTNCCTGGCCNNTTCGTCTGCGNTTGCTGATCGGGCCAGAGGGACG     | MICA*036 | MICA*051  |
| GTGCGTGCTGGCCNNTTCGNCTGCGNTTGCCCNANNNNGGCCNAGAGGGACG   | MICA*036 | MICA*053  |
| NTNNGTNCCTGGCTCTTCGNCTGCGNTTGCCCNANNNNGGCCNAGAGGGACG   | MICA*036 | MICA*054  |
| GTNNGTNCCTGGCTCTTCGNCTGCGNTTGCCCNANNNNGGCCNAGAGGGACG   | MICA*036 | MICA*056  |
| GTNNGTNCCTGGCTCTTCGNCTGCGNTTGCCCNANNNNGGCCAGAGGGACG    | MICA*036 | MICA*057  |
| GTNNGTNCCTGGCCNNTTCGNCTGCGNTTGCCCNANNNNGGCCNAGAGGNACG  | MICA*036 | MICA*058  |
| GTNCGNGCTGGCCNNTTCGTCTGCGNTTGCTGATCGGGCCNAGAGGGACG     | MICA*036 | MICA*059  |
| GTNCGTNCCTGGCCNNTTCGTCTGCGNTTGCCCTTGATCGGGCCAGAGGNACG  | MICA*036 | MICA*060  |
| GTNCGTNCCTGGCCNNTTCGTCTGCGNTTGCCCTTGATCGGGCCANAGGGACG  | MICA*036 | MICA*061  |
| NTNNGTNCCTGGCTCTTCGNCTGCGNTTGCCCNANNNNGGCCNAGAGGNACG   | MICA*036 | MICA*062  |
| GTNNGTNCCTGGCCNNTTCGNCTGCGNTTGCCCNANNNNGGCCNAGAGGGACG  | MICA*036 | MICA*063N |
| GTNNGTNCCTGGCCNNTTCGNCTGCGNTTGCCCNANNNNGGCCNAGAGGGACG  | MICA*036 | MICA*064N |
| NTNNGTNCCTGGCTCTTCGNCTGCGNTTGCCCNANNNNGGCCNAGAGGGACG   | MICA*036 | MICA*065  |
| NTNNGTNCCTGGCTCTTCGNCTGCGNTTGCCCNANNNNGGCCNAGAGGGACG   | MICA*036 | MICA*066  |
| GTNNGTNCCTGGCTCTTCGNCTGCGNTTGCCCNANNNNGGCCAGAGGGACG    | MICA*036 | MICA*067  |
| GTTCGTGCTGGCCCTTCGTCTGCGCTTGCCCCAACTCGGGCCNAGAGGGACG   | MICA*037 | MICA*038  |
| GTTCGTGCTGGCCCTTCGTCTGCGCTTGCCCCAACTCGGGCCGAGGGACG     | MICA*037 | MICA*039  |
| GTTCGTGCTGGCCCTTCGTNTGCGCTTGCCCCANNNNGGCCNAGAGGGACG    | MICA*037 | MICA*040  |
| GTNCGNGCTGGCCCTTCGTCTGCGCTTGCCCNANNNNGGCCNAGAGGGACG    | MICA*037 | MICA*041  |
| GTTCGTGCTGGCCCTTCGTCTGCGCTTGCCCCAACTCGGGCCGAGGGACG     | MICA*037 | MICA*042  |
| GTTCGTGCTGGCCCTTCGTCTGCGCTTGCCCNANNNNGGCCNAGAGNGACG    | MICA*037 | MICA*043  |
| GTNCGTNCCTGGCCNNTTCGNCTGCGCTTGCCCCAACTCGGGCCNAGAGGGACG | MICA*037 | MICA*044  |
| GTTCGTGCTGGCCCTTCGTCTGCGCTTGCCCNANNNNGGCCNAGAGGGACG    | MICA*037 | MICA*045  |
| GTNCGTGCTGGCCCTTCGTCTGCGCTTGCCCNANNNNGGCCNAGAGGGACG    | MICA*037 | MICA*046  |
| GTNCGNGCTGGCCCTTCGTCTGCGCTTGCCCNANNNNGGCCNAGAGGGACG    | MICA*037 | MICA*047  |
| GTNCGTGCTGGCCCTTCGTCTGCGCTTGCCCNANNNNGGCCNAGAGGGACG    | MICA*037 | MICA*050  |
| GTTCGTGCTGGCCCTTCGTCTGCGCTTGCCCNANNNNGGCCNAGAGGGACG    | MICA*037 | MICA*051  |
| GTNCGTGCTGGCCNNTTCGNCTGCGCTTGCCCCAACTCGGGCCGAGGGACG    | MICA*037 | MICA*053  |
| NTNNGTNCCTGGCCNNTTCGNCTGCGCTTGCCCCAACTCGGGCCGAGGGACG   | MICA*037 | MICA*054  |
| GTTCGTGCTGGCCNNTTCGNCTGCGCTTGCCCCAACTCGGGCCGAGGGACG    | MICA*037 | MICA*056  |
| GTTCGTGCTGGCCNNTTCGNCTGCGCTTGCCCCAACTCGGGCCGAGGGACG    | MICA*037 | MICA*057  |
| GTTCGTGCTGGCCNNTTCGNCTGCGCTTGCCCCAACTCGGGCCGAGGNACG    | MICA*037 | MICA*058  |
| GTTCGTGCTGGCCCTTCGTCTGCGCTTGCCCNANNNNGGCCNAGAGGGACG    | MICA*037 | MICA*059  |
| GTTCGTGCTGGCCCTTCGTCTGCGCTTGCCCNANNNNGGCCNAGAGGNACG    | MICA*037 | MICA*060  |
| GTTCGTGCTGGCCCTTCGTCTGCGCTTGCCCNANNNNGGCCNAGAGGGACG    | MICA*037 | MICA*061  |
| NTNNGTNCCTGGCCNNTTCGNCTGCGCTTGCCCCAACTCGGGCCGAGGNACG   | MICA*037 | MICA*062  |
| GTTCGTGCTGGCCNNTTCGNCTGCGCTTGCCCCAACTCGGGCCGAGGGACG    | MICA*037 | MICA*063N |
| GTTCGTGCTGGCCNNTTCGNCTGCGCTTGCCCCAACTCGGGCCGAGGGACG    | MICA*037 | MICA*064N |
| NTNNGTNCCTGGCCNNTTCGNCTGCGCTTGCCCCAACTCGGGCCGAGGGACG   | MICA*037 | MICA*065  |
| NTNNGTNCCTGGCCNNTTCGNCTGCGCTTGCCCCAACTCGGGCCGNGGGACG   | MICA*037 | MICA*066  |
| GTTCGTGCTGGCCNNTTCGNCTGCGCTTGCCCCAACTCGGGCCNAGAGGGACG  | MICA*037 | MICA*067  |
| GTTCGTGCTGGCCCTTCGTCTGCGCTTGCCCCAACTCGGGCCNAGAGGGACG   | MICA*038 | MICA*039  |
| GTTCGTGCTGGCCCTTCGTNTGCGCTTGCCCNANNNNGGCCAGAGGGACG     | MICA*038 | MICA*040  |









|                                                       |          |           |
|-------------------------------------------------------|----------|-----------|
| GTNNGTACTGGCCCTTCGCCTGCGCTTGCCCCAACTCGGNC CGGAGGGACG  | MICA*053 | MICA*064N |
| NTNNGTACTGGCNCCTTCGCCTGCGCTTGCCCCAACTCGGGCCGGAGGGACG  | MICA*053 | MICA*065  |
| NTNNGTACTGGCNCCTTCGCCTGCGCTTGCCCCAACTCGGGCCGGNNGGACG  | MICA*053 | MICA*066  |
| GTNNGTACTGNCNCTTCGCCTGCGCTTGCCCCAAACNCGGGCCNAGAGGGACG | MICA*053 | MICA*067  |
| NTTTGACTGGCTCTTCGCCTGCGCTTGCCCCAACTCGNGCCGGAGGGNCG    | MICA*054 | MICA*056  |
| NTTTGACTGGCTCTTCGCCTGCGCTTGCCCCAACTCGGGCCNAGAGGNCG    | MICA*054 | MICA*057  |
| NTTTGACTGGCNCCTTCGCCTGCGCTTGCCCCAACTCGGGCCGGAGGNCG    | MICA*054 | MICA*058  |
| NTTNGNCTGGCNCCTTCGCCTGCGCTTGCCCCAACTCGGGCCNAGAGGNCG   | MICA*054 | MICA*059  |
| NTTNTNCTGNCNNTTCGCCTGCGCTTGCCCCAACTCGGGCCNAGAGGNCG    | MICA*054 | MICA*060  |
| NTTNTNCTGNCNNTTCGCCTGCGCTTGCCCCAACTCGGGCCNAGAGGNCG    | MICA*054 | MICA*061  |
| CTTTGACTGGCTCTTCGCCTGCGCTTGCCCCAACTCGGGCCGGAGGNCG     | MICA*054 | MICA*062  |
| NTTTGTANTGGCNCCTTCGCCTGCGCTTGCCCCAACTCGGGCCGGAGGNCG   | MICA*054 | MICA*063N |
| NTTTGACTGGCNCCTTCGCCTGCGCTTGCCCCAACTCGGGCCGGAGGNCG    | MICA*054 | MICA*064N |
| CTTTGACTGGCTCTTCGCCTGCGCTTGCCCCAACTCGGGCCGGAGGNCG     | MICA*054 | MICA*065  |
| CTTTGACTGGCTCTTCGCCTGCGCTTGCCCCAACTCGGGCCGGAGGNCG     | MICA*054 | MICA*066  |
| NTTTGACTGNCCTTCGCCTGCGCTTGCCCCAAACNCGGGCCNAGAGGNCG    | MICA*054 | MICA*067  |
| GTTTGACTGGCTCTTCGCCTGCGCTTGCCCCAACTCGNGCCNAGAGGACG    | MICA*056 | MICA*057  |
| GTTTGACTGGCNCCTTCGCCTGCGCTTGCCCCAACTCGNGCCGGAGNACG    | MICA*056 | MICA*058  |
| GTTNNGNCTGGCNCCTTCGCCTGCGCTTGCCCCAACTCGNGCCNAGAGGACG  | MICA*056 | MICA*059  |
| GTTNNTNCTGNCNNTTCGCCTGCGCTTGCCCCAACTCGNGCCNAGAGNACG   | MICA*056 | MICA*060  |
| GTTNNTNCTGNCNNTTCGCCTGCGCTTGCCCCAACTCGNGCCNAGAGGACG   | MICA*056 | MICA*061  |
| NTTTGACTGGCTCTTCGCCTGCGCTTGCCCCAACTCGNGCCGGAGGNACG    | MICA*056 | MICA*062  |
| GTTTGACTGGCNCCTTCGCCTGCGCTTGCCCCAACTCGNGCCGGAGGACG    | MICA*056 | MICA*063N |
| GTTTGACTGGCNCCTTCGCCTGCGCTTGCCCCAACTCGNCCGGAGGGACG    | MICA*056 | MICA*064N |
| NTTTGACTGGCTCTTCGCCTGCGCTTGCCCCAACTCGNGCCGGAGGGACG    | MICA*056 | MICA*065  |
| NTTTGACTGGCTCTTCGCCTGCGCTTGCCCCAACTCGNGCCGGAGGACG     | MICA*056 | MICA*066  |
| GTTTGACTGNCCTTCGCCTGCGCTTGCCCCAAACNCGNGCCNAGAGGACG    | MICA*056 | MICA*067  |
| GTTTGACTGGCNCCTTCGCCTGCGCTTGCCCCAACTCGGGCCNAGAGNACG   | MICA*057 | MICA*058  |
| GTTNNGNCTGGCNCCTTCGCCTGCGCTTGCCCCAACTCGGGCCNAGAGGACG  | MICA*057 | MICA*059  |
| GTTNNTNCTGNCNNTTCGCCTGCGCTTGCCCCAACTCGGGCCNAGAGNACG   | MICA*057 | MICA*060  |
| GTTNNTNCTGNCNNTTCGCCTGCGCTTGCCCCAACTCGGGCCNAGAGGACG   | MICA*057 | MICA*061  |
| NTTTGACTGGCTCTTCGCCTGCGCTTGCCCCAACTCGGGCCNAGAGNACG    | MICA*057 | MICA*062  |
| GTTTGACTGGCNCCTTCGCCTGCGCTTGCCCCAACTCGGGCCNAGAGGACG   | MICA*057 | MICA*063N |
| GTTTGACTGGCNCCTTCGCCTGCGCTTGCCCCAACTCGNGCCNAGAGGACG   | MICA*057 | MICA*064N |
| NTTTGACTGGCTCTTCGCCTGCGCTTGCCCCAACTCGGGCCNAGAGGACG    | MICA*057 | MICA*065  |
| NTTTGACTGGCTCTTCGCCTGCGCTTGCCCCAACTCGGGCCNAGAGGACG    | MICA*057 | MICA*066  |
| GTTTGACTGNCCTTCGCCTGCGCTTGCCCCAAACNCGGGCCNAGAGGACG    | MICA*057 | MICA*067  |
| GTTNNGNCTGGCNCCTTCGCCTGCGCTTGCCCCAACTCGGGCCNAGAGNACG  | MICA*058 | MICA*059  |
| GTTNNTNCTGNCNNTTCGCCTGCGCTTGCCCCAACTCGGGCCNAGAGGACG   | MICA*058 | MICA*060  |
| GTTNNTNCTGNCNNTTCGCCTGCGCTTGCCCCAACTCGGGCCNAGAGNACG   | MICA*058 | MICA*061  |
| NTTTGACTGGCNCCTTCGCCTGCGCTTGCCCCAACTCGGGCCGGAGGACG    | MICA*058 | MICA*062  |
| GTTTGACTGGCNCCTTCGCCTGCGCTTGCCCCAACTCGGGCCGGAGGNACG   | MICA*058 | MICA*063N |
| GTTTGACTGGCNCCTTCGCCTGCGCTTGCCCCAACTCGNGCCGGAGGNACG   | MICA*058 | MICA*064N |
| NTTTGACTGGCNCCTTCGCCTGCGCTTGCCCCAACTCGGGCCGGAGGNACG   | MICA*058 | MICA*065  |
| NTTTGACTGGCNCCTTCGCCTGCGCTTGCCCCAACTCGGGCCGGNNGNACG   | MICA*058 | MICA*066  |
| GTTTGACTGNCNCTTCGCCTGCGCTTGCCCCAAACNCGGGCCNAGAGNACG   | MICA*058 | MICA*067  |
| GTTCCNNGCTGNCCTNTGCTGCGCTTGCGCTTGATCGGGCCNAGAGGNACG   | MICA*059 | MICA*060  |
| GTTCCNNGCTGNCCTNTGCTGCGCTTGCGCTTGATCGGGCCNANAGGACG    | MICA*059 | MICA*061  |
| NTTNGNCTGGCNCCTTCGCCTGCGCTTGCCCCAACTCGGGCCNAGAGNACG   | MICA*059 | MICA*062  |
| GTTNNGNCTGGCNCCTTCGCCTGCGCTTGCCCCAACTCGGGCCNAGAGGACG  | MICA*059 | MICA*063N |
| GTTNNGNCTGGCNCCTTCGCCTGCGCTTGCCCCAACTCGGGCCNAGAGGACG  | MICA*059 | MICA*064N |
| NTTNGNCTGGCNCCTTCGCCTGCGCTTGCCCCAACTCGGGCCNAGAGGACG   | MICA*059 | MICA*065  |
| NTTNGNCTGGCNCCTTCGCCTGCGCTTGCCCCAACTCGGGCCNAGAGGACG   | MICA*059 | MICA*066  |
| GTTNNGNCTGNCNNTTCGCCTGCGCTTGCCCCAACTCGGGCCNAGAGGACG   | MICA*059 | MICA*067  |
| GTTTCATGCTAGCCTATGCTGCGCTTGCCCCAACTCGGGCCNAGAGNACG    | MICA*060 | MICA*061  |
| NTTNTNCTGNCNNTTCGCCTGCGCTTGCCCCAACTCGGGCCNAGAGGACG    | MICA*060 | MICA*062  |
| GTTNNTNCTGNCNNTTCGCCTGCGCTTGCCCCAACTCGGGCCNAGAGNACG   | MICA*060 | MICA*063N |
| GTTNNTNCTGNCNNTTCGCCTGCGCTTGCCCCAACTCGGGCCNAGAGNACG   | MICA*060 | MICA*064N |
| NTTNTNCTGNCNNTTCGCCTGCGCTTGCCCCAACTCGGGCCNAGAGNACG    | MICA*060 | MICA*065  |

|                                                       |                                                             |                                                             |                            |
|-------------------------------------------------------|-------------------------------------------------------------|-------------------------------------------------------------|----------------------------|
| NTTNNCTNCTNGCNCNNTCGNCTGCGCTTGCCCNANNNNGGGCCNGGAGGACG | MICA*060                                                    | MICA*066                                                    |                            |
| GTTNNCTNCTNCCNNTCGNCTGCGCTTGCCCNANNNNGGGCCAGAGGACG    | MICA*060                                                    | MICA*067                                                    |                            |
| NTTNNCTNCTNGCNCNNTCGNCTGCGCTTGCCCNANNNNGGGCCNAGAGGACG | MICA*061                                                    | MICA*062                                                    |                            |
| GTTNNCTNCTNGCNCNNTCGNCTGCGCTTGCCCNANNNNGGGCCNAGAGGACG | MICA*061                                                    | MICA*063N                                                   |                            |
| GTTNNCTNCTNGCNCNNTCGNCTGCGCTTGCCCNANNNNGGGCCNAGAGGACG | MICA*061                                                    | MICA*064N                                                   |                            |
| NTTNNCTNCTNGCNCNNTCGNCTGCGCTTGCCCNANNNNGGGCCNAGAGGACG | MICA*061                                                    | MICA*065                                                    |                            |
| NTTNNCTNCTNGCNCNNTCGNCTGCGCTTGCCCNANNNNGGGCCNAGAGGACG | MICA*061                                                    | MICA*066                                                    |                            |
| GTTNNCTNCTNCCNNTCGNCTGCGCTTGCCCNANNNNGGGCCANAGAGGACG  | MICA*062                                                    | MICA*067                                                    |                            |
| NTTGTANTGGCNCCTTGCCTGCGCTTGCCCCAACTCGGGCCGAGGACG      | MICA*062                                                    | MICA*063N                                                   |                            |
| NTTGTACTGGCNCCTTGCCTGCGCTTGCCCCAACTCGGGCCGAGGACG      | MICA*062                                                    | MICA*064N                                                   |                            |
| CTTTGTACTGGCTCTTGCCTGCGCTTGCCCCAACTCGGGCCGAGGACG      | MICA*062                                                    | MICA*065                                                    |                            |
| CTTTGTACTGGCTCTTGCCTGCGCTTGCCCCAACTCGGGCCGAGGACG      | MICA*062                                                    | MICA*066                                                    |                            |
| NTTGTACTGNCTCTTGCCTNCGCNTGCCCCAACTCGGGCCGAGGACG       | MICA*062                                                    | MICA*067                                                    |                            |
| GTTGTANTGGCCCTTGCCTGCGCTTGCCCCAACTCGGGCCGAGGACG       | MICA*063N                                                   | MICA*064N                                                   |                            |
| NTTGTANTGGCNCCTTGCCTGCGCTTGCCCCAACTCGGGCCGAGGACG      | MICA*063N                                                   | MICA*065                                                    |                            |
| NTTGTANTGGCNCCTTGCCTGCGCTTGCCCCAACTCGGGCCGAGGACG      | MICA*063N                                                   | MICA*066                                                    |                            |
| GTTGTANTGNCNCTTGCCTNCGCNTGCCCCAACTCGGGCCGAGGACG       | MICA*063N                                                   | MICA*067                                                    |                            |
| NTTGTACTGGCNCCTTGCCTGCGCTTGCCCCAACTCGGGCCGAGGACG      | MICA*064N                                                   | MICA*065                                                    |                            |
| NTTGTACTGGCNCCTTGCCTGCGCTTGCCCCAACTCGGGCCGAGGACG      | MICA*064N                                                   | MICA*066                                                    |                            |
| GTTGTACTGNCNCTTGCCTNCGCNTGCCCCAACTCGGGCCGAGGACG       | MICA*064N                                                   | MICA*067                                                    |                            |
| GTTGATGCTAGCCTTTGCTGCGCTTGCCCCAACTCGGGCCGAGGACG       | MICA*065                                                    | MICA*066                                                    |                            |
| NTTGTACTGNCNCTTGCCTNCGCNTGCCCCAACTCGGGCCGAGGACG       | MICA*065                                                    | MICA*067                                                    |                            |
| NTTGTACTGNCTCTTGCCTNCGCNTGCCCCAACTCGGGCCGAGGACG       | MICA*066                                                    | MICA*067                                                    |                            |
| GTTGATGCTAGCCTTTGCTGCGCTTGCCCCAACTCGGGCCGAGGACG       | MICA*001                                                    | MICA*001                                                    |                            |
| GTGCGTGTGGCCTTTGCTGCGCTTGCCCTTGATCGGGCCAGAGGACG       | MICA*002:01/MICA*020/MICA*023/MICA*052/MICA*055             | MICA*002:01/MICA*020/MICA*023/MICA*052/MICA*055             | Exon 5                     |
| GTGCGTGTGGCCTTTGCTGCGCTTGCCCTTGATCGGGCCAGAGGACG       | MICA*002:02                                                 | MICA*002:02                                                 |                            |
| GCGCGTGTGGCCTTTGCTGCGCTTGCCCTTGATCGGGCCAGAGGACG       | MICA*002:03                                                 | MICA*002:03                                                 |                            |
| GTGCGTGTGGCCTTTGCTGCGCTTGCCCTTGATCGGGCCAGAGGACG       | MICA*002:04                                                 | MICA*002:04                                                 |                            |
| GTTTGTACTGCCCTTTGCTGCGCTTGCCCCAACTCGGGCCAGAGGACG      | MICA*004                                                    | MICA*004                                                    |                            |
| GTTTGTACTGGCCTTTGCTGCGCTTGCCCTCAACCCGGCCAGAGGAC*      | MICA*005                                                    | MICA*005                                                    | Please see footnote 3      |
| GTTTGTACTGGCTTTGCTGCGCTTGCCCCAACTCGGGCCAGAGGACG       | MICA*006                                                    | MICA*006                                                    |                            |
| GTTGCTGTGGCCTTTGCTGCGCTTGCTTGATCGGGCCAGAGGACG         | MICA*007:01/MICA*026                                        | MICA*007:01/MICA*026                                        | Exon 5                     |
| GTTGCTGTGGCCTTTGCTGCGCTTGCCCTTGATCGGGCCAGAGGACG       | MICA*007:02                                                 | MICA*007:02                                                 |                            |
| GTTGCTGTGGCCTTTGCTGCTGCACTTGCTTGATCGGGCCAGAGGACG      | MICA*007:03                                                 | MICA*007:03                                                 |                            |
| GTTGCTGTAGCCTTTGCTGCGCTTGCCCTTGATCGGGCCAGAGGACG       | MICA*007:04                                                 | MICA*007:04                                                 |                            |
| GTTTGTACTGGCCTTTGCTGCGCTTGCCCCAACTCGGGCCAGAGGACG      | MICA*008:01:01/MICA*008:01:02/MICA*008:04/MICA*027/MICA*048 | MICA*008:01:01/MICA*008:01:02/MICA*008:04/MICA*027/MICA*048 | Exons 1 and 5 and intron 1 |
| GTTTGTACTGGCCTTTGCTGCGCTTGCCCCAACTCGGGCCAGAGGACG      | MICA*008:02                                                 | MICA*008:02                                                 |                            |
| GTTTGTACTGGCCTTTGCTGCGCTTGCCCAACTCGGGCCAGAGGACG       | MICA*008:03                                                 | MICA*008:03                                                 |                            |
| GTTTGTACTGGCTTTGCTGCGCTTGCCCCAACTCGGGCCAGAGGACG       | MICA*009:01/MICA*049                                        | MICA*009:01/MICA*049                                        | Exon 6                     |
| GTTTGTACTGGCTTTGCTGCGCTTGCCCCAACTCGGGCCAGAGGACG       | MICA*009:02                                                 | MICA*009:02                                                 |                            |
| CTTTGTACTGGCTTTGCTGCGCTTGCCCCAACTCGGGCCAGAGGACG       | MICA*010:01/MICA*010:02                                     | MICA*010:01/MICA*010:02                                     | Exon 5                     |
| GTGCGTGTGGCCTTTGCTGCGCTTGCCCTTGATCGGGCCAGAGGACG       | MICA*011                                                    | MICA*011                                                    |                            |
| GTTGATGCTAGCCTATCGCTGCGCTTGCCCTTGATCGGGCCAGAGGACG     | MICA*012:01                                                 | MICA*012:01                                                 |                            |
| GTTGATGCTAGCCTATCGCTGCGCTTGCCCTTGATCGGGCCAGAGGACG     | MICA*012:02                                                 | MICA*012:02                                                 |                            |
| GTTGATGCTAGCCTATCGCTGCGCTTGCCCTTGATCGGGCCAGAGGACG     | MICA*012:03                                                 | MICA*012:03                                                 |                            |
| GTGCGTGTGGCCTTTGCTGCGCTTGCCCTTGATCGGGCCAGAGGAC*       | MICA*013                                                    | MICA*013                                                    | Please see footnote 3      |
| GTGCGTGTGGCCTTTGCTGCGCTTGCCCTTGATCGGGCCAGAGGAC*       | MICA*014                                                    | MICA*014                                                    | Please see footnote 3      |
| GTTGCTGTGGCCTTTGCTGCGCTTGCCCTTGATCGGGCCAGAGGAC.       | MICA*015                                                    | MICA*015                                                    |                            |
| GTTTGTACTGGCTTTGCTGCGCTTGCCCCAACTCGGGCCAGAGGACG       | MICA*016                                                    | MICA*016                                                    |                            |
| GTGCGTGTGGCCTTTGCTGCGCTTGCCCTTGATCGGGCCAGAGGACG       | MICA*017                                                    | MICA*017                                                    |                            |
| GTTGATGCTAGCCTTTGCTGCGCTTGCCCTTGATCGGGCCAGAGGACG      | MICA*018:01                                                 | MICA*018:01                                                 |                            |
| GTTGATGCTAGCCTTTGCTGCGCTTGCTTGATCGGGCCAGAGGACG        | MICA*018:02                                                 | MICA*018:02                                                 |                            |
| GTTTGTACTGGCTTTGCTGCGCTTGCCCCAACTCGGGCCAGAGGACG       | MICA*019                                                    | MICA*019                                                    |                            |
| GTGCGTGTGGCTTTGCTGCGCTTGCCCCAACTCGGGCCAGAGGACG        | MICA*022                                                    | MICA*022                                                    |                            |
| GTTTGTACTGGCCTTTGCTGCGCTTGCCCCAACTCGGGCCAGAGGACG      | MICA*024                                                    | MICA*024                                                    |                            |
| CTTTGTACTGGCCTTTGCTGCGCTTGCCCTTGATCGGGCCAGAGGACG      | MICA*025                                                    | MICA*025                                                    |                            |
| GTTTGTACTGGCCTTTGCTGCGCTTGCCCTTGATCGGGCCAGAGGACG      | MICA*028                                                    | MICA*028                                                    |                            |
| GTTGCTGTGGCCTTTGCTGCGCTTGCCCTTGATCGGGCCAGAGGACG       | MICA*029                                                    | MICA*029                                                    |                            |
| GTGCGTGTGGCCTTTGCTGCGCTTGCCCTTGATCGGGCCAGAGGACG       | MICA*030                                                    | MICA*030                                                    |                            |



|                        |        |                         |                        |           |          |
|------------------------|--------|-------------------------|------------------------|-----------|----------|
| GTTTGTACTGGCCTTCGTTTGC | GCTTGC | CCTGCC                  | CTTGATCGGGGCCAGAGGGACG | MICA*031  | MICA*031 |
| GTTTGTACTGCCTTATCGTCTG | CGCTTG | CCTTGATCGGGGCCAGAGGGACG | MICA*032               | MICA*032  |          |
| GTTTGTACTGGCTCTTCGCCA  | GCCTTG | CCTTGATCGGGGCCAGAGGGACG | MICA*033               | MICA*033  |          |
| GTGCGTGTGGCCTTCCTGCTG  | CGCTTG | CCTTGATCGGGGCCAGAGGGACG | MICA*034               | MICA*034  |          |
| GTGCGTGTGGCCTTTCGTCTG  | CGCTTG | CCTTGATCGGGGCCAGAGGGACG | MICA*035               | MICA*035  |          |
| GTGCGTGTGGCCTTTCGTCTG  | CGCTTG | CCTTGATCGGGGCCAGAGGGACG | MICA*036               | MICA*036  |          |
| GTTCTGTGTGGCCTTTCGTCTG | CGCTTG | CCTTGATCGGGGCCAGAGGGACG | MICA*037               | MICA*037  |          |
| GTTCTGTGTGGCCTTTCGTCTG | CGCTTG | CCTTGATCGGGGCCAGAGGGACG | MICA*038               | MICA*038  |          |
| GTTCTGTGTGGCCTTTCGTCTG | CGCTTG | CCTTGATCGGGGCCAGAGGGACG | MICA*039               | MICA*039  |          |
| GTTCTGTGTGGCCTTTCGTCTG | CGCTTG | CCTTGATCGGGGCCAGAGGGACG | MICA*040               | MICA*040  |          |
| GTGCGGGCTGGCCTTTCGTCTG | CGCTTG | CCTTGATCGGGGCCAGAGGGACG | MICA*041               | MICA*041  |          |
| GTTTGTACTGGCCTTTCGTCTG | CGCTTG | CCTTGATCGGGGCCAGAGGGACG | MICA*042               | MICA*042  |          |
| GTTCTGTGTGGCCTTTCGTCTG | CGCTTG | CCTTGATCGGGGCCAGAGGGACG | MICA*043               | MICA*043  |          |
| GTGCGTACTGCCTTTCGCCTC  | CGCTTG | CCTTGATCGGGGCCAGAGGGACG | MICA*044               | MICA*044  |          |
| GTTCTGTGTGGCCTTTCGTCTG | CGCTTG | CCTTGATCGGGGCCAGAGGGACG | MICA*045               | MICA*045  |          |
| GTGCGTGTGGCCTTTCGTCTG  | CGCTTG | CCTTGATCGGGGCCAGAGGGACG | MICA*046               | MICA*046  |          |
| GTGCGGGCTGGCCTTTCGTCTG | CGCTTG | CCTTGATCGGGGCCAGAGGGACG | MICA*047               | MICA*047  |          |
| GTGCGTGTGGCCTTTCGTCTG  | CGCTTG | CCTTGATCGGGGCCAGAGGGACG | MICA*050               | MICA*050  |          |
| GTTTGTACTGGCCTTTCGTCTG | CGCTTG | CCTTGATCGGGGCCAGAGGGACG | MICA*051               | MICA*051  |          |
| GTGCGTGTGGCCTTTCGCCTG  | CGCTTG | CCTTGATCGGGGCCAGAGGGACG | MICA*053               | MICA*053  |          |
| CTTTGTACTGGCTCTTCGCCTG | CGCTTG | CCTTGATCGGGGCCAGAGGGACG | MICA*054               | MICA*054  |          |
| GTTTGTACTGGCTCTTCGCCTG | CGCTTG | CCTTGATCGGGGCCAGAGGGACG | MICA*056               | MICA*056  |          |
| GTTTGTACTGGCTCTTCGCCTG | CGCTTG | CCTTGATCGGGGCCAGAGGGACG | MICA*057               | MICA*057  |          |
| GTTTGTACTGGCCTTTCGCCTG | CGCTTG | CCTTGATCGGGGCCAGAGGGACG | MICA*058               | MICA*058  |          |
| GTTCTGGCTGGCCTTTCGTCTG | CGCTTG | CCTTGATCGGGGCCAGAGGGACG | MICA*059               | MICA*059  |          |
| GTTCTAGCTAGCCTATCGTCTG | CGCTTG | CCTTGATCGGGGCCAGAGGGACG | MICA*060               | MICA*060  |          |
| GTTCTAGCTAGCCTATCGTCTG | CGCTTG | CCTTGATCGGGGCCAGAGGGACG | MICA*061               | MICA*061  |          |
| CTTTGTACTGGCTCTTCGCCTG | CGCTTG | CCTTGATCGGGGCCAGAGGGACG | MICA*062               | MICA*062  |          |
| GTTTGATTGGCCCTTCGCCTG  | CGCTTG | CCTTGATCGGGGCCAGAGGGACG | MICA*063N              | MICA*063N |          |
| GTTTGTACTGGCCCTTCGCCTG | CGCTTG | CCTTGATCGGGGCCAGAGGGACG | MICA*064N              | MICA*064N |          |
| CTTTGTACTGGCTCTTCGCCTG | CGCTTG | CCTTGATCGGGGCCAGAGGGACG | MICA*065               | MICA*065  |          |
| CTTTGTACTGGCTCTTCGCCTG | CGCTTG | CCTTGATCGGGGCCAGAGGGACG | MICA*066               | MICA*066  |          |
| GTTTGTACTGCCTTTCGCCTC  | CGCTTG | CCTTGATCGGGGCCAGAGGGACG | MICA*067               | MICA*067  |          |

<sup>1</sup>N refers to heterozygosity at that position.

Polymorphic positions in the 52 nucleotide string are listed as sense strand for exon 2 (nucleotides 1-10), antisense strand for exon 3 (nucleotides 11-28) and sense strand for exon 4 (nucleotides 29-52) in 5'-3' direction.

<sup>2</sup>cDNA position 536 in exon 3 can encode A, C or T (in antisense strand). There are no ambiguous combinations involving this position; however, the program will provide all possible combinations as if it were ambiguous. A sample heterozygous for MICA\*012:01, MIC\*043 will have an A/C at this position. A sample heterozygous for MICA\*018:01, MICA\*043 will have T/C at this position.

<sup>3</sup>MICA\*005, MICA\*013 and MICA\*014 have insufficient data for the cDNA position 892 in exon 4. In the string, this 52nd position displays as \* or N when these alleles are present. If the string is truncated to 51 nucleotides by excluding nucleotide 52, the combinations listed above do not change and the only additional ambiguities are the combination of MICA\*022, MIC\*028 or MICA\*013, MICA\*057.

**Table S2** Further characterization of exon 5 for groups of alleles with identical sequences in exons 2, 3, and 4 (adapted from Zou et al., reference 1). Sequencing of exon 5 in the reverse direction provides information on the number of GTC repeats and four polymorphic positions shown below that can be used to delineate some of the ambiguous allele combinations.

| Group <sup>1</sup> | Alleles        | STR type <sup>2</sup> | Exon 5 polymorphic position <sup>3</sup> |     |     |      |
|--------------------|----------------|-----------------------|------------------------------------------|-----|-----|------|
|                    |                |                       | 981                                      | 982 | 985 | 1017 |
| 1                  | MICA*002:01    | A9                    | G                                        | C   | A   | C    |
|                    | MICA*020       | A10                   | G                                        | C   | A   | C    |
|                    | MICA*023       | A5.1                  | A                                        | C   | G   | *    |
|                    | MICA*052       | A9                    | G                                        | T   | A   | C    |
|                    | MICA*055       | A8                    | G                                        | C   | A   | *    |
| 2                  | MICA*008:01:01 | A5.1                  | A                                        | C   | G   | C    |
|                    | MICA*008:01:02 | A5.1                  | A                                        | C   | G   | C    |
|                    | MICA*008:04    | A5.1                  | A                                        | C   | G   | C    |
|                    | MICA*027       | A5                    | A                                        | C   | G   | C    |
|                    | MICA*048       | A5                    | A                                        | C   | G   | A    |
| 3                  | MICA*007:01    | A4                    | A                                        | C   | G   | C    |
|                    | MICA*026       | A6                    | A                                        | C   | G   | C    |
| 4                  | MICA*009:01    | A6                    | A                                        | C   | G   | C    |
|                    | MICA*049       | A6                    | A                                        | C   | G   | C    |
| 5                  | MICA*010:01    | A5                    | A                                        | C   | G   | C    |
|                    | MICA*010:02    | A5                    | A                                        | C   | G   | C    |

<sup>1</sup> Group 2 alleles MICA\*008:01:01 and MICA\*008:01:02 differ in intron 1.

MICA\*008:04 differs from MICA\*008:01:01 and MICA\*008:01:02 in exon 1 at cDNA nucleotide position 21.

Group 4 alleles MICA\*009:01 and MICA\*049 differ in exon 6 at cDNA nucleotide position 1067.

Group 5 alleles MICA\*010:01 and MICA\*010:02 differ in exon 5 at cDNA nucleotide position 933; this position can be read with the help of Supplementary Table 3.

<sup>2</sup>Short tandem repeat (STR) type named according to Mizuki et al. (2).

<sup>3</sup>Numbered according to IMGT/HLA database v.3.7.0 (<http://www.ebi.ac.uk/imgt/hla/>).

Nucleotides for exon 5 positions are shown for antisense strand.

\* Unknown sequence.

## References

1. Zou Y, Han M, Wang Z, Stastny P. MICA allele-level typing by sequence-based typing with computerized assignment of polymorphic sites and short tandem repeats within the transmembrane region. *Hum Immunol* 2006; 67:145-51.
2. Mizuki N, Ota M, Kimura M, et al. Triplet repeat polymorphism in the transmembrane region of the MICA gene: a strong association of six GCT repetitions with Behçet disease. *Proc Natl Acad Sci USA* 1997; 94: 1298-303.



|    |                     |                                                                                                                                   |
|----|---------------------|-----------------------------------------------------------------------------------------------------------------------------------|
| 22 | A6/A10              | A G C A G C A G C A G C A G C A G C A G C A A/G C A G C A G A/C A A/G C A A/T C/G A/G A/G A/C A/T G A/T A/C A/T                   |
| 23 | A7/A8               | A G C A G C A G C A G C A G C A G C A G C A G C A A/G C A A/G C A G A/C A A/G A/C A A/T C/G A/G A/T A/G G/T A/G A/T C/T G/T       |
| 24 | A7/A9               | A G C A G C A G C A G C A G C A G C A G C A G C A A/G C A G C A A/G A/C A A/G C A G/T A/G A/G A A/C A/T G/T G/T C/G A/T           |
| 25 | A7/A10              | A G C A G C A G C A G C A G C A G C A G C A G C A A/G C A G C A G A/C A A C A G/T C/G A/G A/G A A/T A/G C/T A/C T                 |
| 26 | A8/A9               | A G C A G C A G C A G C A G C A G C A G C A G C A G C A A/G C A A/G C A G A/C A A/G A/C A A/T C/G A/G A/T A/G G/T A/G A/T         |
| 27 | A8/A10              | A G C A G C A G C A G C A G C A G C A G C A G C A G C A A/G C A G C A A/G A/C A A/G C A G/T A/G A/G A A/C A/T G/T G/T             |
| 28 | A9/A10              | A G C A G C A G C A G C A G C A G C A G C A G C A G C A A/G C A A/G C A G A/C A A/G A/C A A/T C/G A/G A/T A/G G/T A/G A/T C/T G/T |
| 29 | MICA*010:02 A5/A4   | A G C A G C A G C A G C A G C A A/G C A A/G C A G A/C A A/G A/C A A/T C/G G A/T A/G G/T A/G A/T C/T G/T                           |
| 30 | MICA*010:02 A5/A5.1 | A G C A G C A G C A/G A/G C/G A/C A/G C/G A/C A A/C A/C A/G C/G A/C A/G A/G A A A/C C/G A/T G/T G A/G A A/T G/T G/T C/T C/T       |
| 31 | MICA*010:02 A5/A6   | A G C A G C A G C A G C A G C A G C A A/G C A A/G C A G A/C A A/G A/C A/G A/T C/G A/G A/T A/G G/T A/G A/T C/T G/T                 |
| 32 | MICA*010:02 A5/A7   | A G C A G C A G C A G C A G C A G C A A/G C A G C A A/G A/C A A/G C A/G G/T A/G A/G A A/C A/T G/T G/T C/G A/T                     |
| 33 | MICA*010:02 A5/A8   | A G C A G C A G C A G C A G C A G C A A/G C A G C A G A/C A A C A/G G/T C/G A/G A/G A A/T A/G C/T A/C T                           |
| 34 | MICA*010:02 A5/A9   | A G C A G C A G C A G C A G C A G C A A/G C A G C A G A/C A A/G C A/G A/T C/G A/G A/G A/C A/T G A/T A/C A/T                       |
| 35 | MICA*010:02 A5/A10  | A G C A G C A G C A G C A G C A G C A A/G C A G C A G A/C A A/G C A/G G/T C/G A/G A A/C A/T G C/T A/C G/T                         |

<sup>1</sup> All nucleotides are shown on antisense strand in the 5'-3' direction.

In addition to the STR repeat, the MICA\*010:02 allele has a polymorphic position at cDNA nucleotide position 933 which can be determined by the unique patterns (pattern numbers 29-35).
